# Supplementary material for: Ketamine vs Electroconvulsive Therapy for Treatment-Resistant Depression: A Secondary Analysis of a Randomized Clinical Trial
Source: PubMed Central journal article supplement (PMC11200139; doi:10.1001/jamanetworkopen.2024.17786), 2024-06-25
Supplement: jamanetwopen-e2417786-s001.pdf [file jamanetwopen-e2417786-s001.pdf]

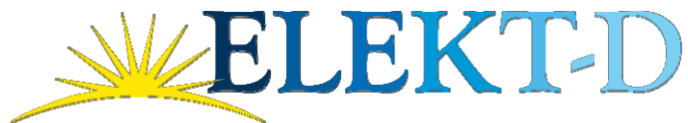

1

2

3

4

5

6 **ELEKT-D: Electroconvulsive therapy (ECT) vs. ketamine in patients with**  
7 **treatment resistant depression (TRD)**

8

9

10 Version Date: 02FEB2017

11 Protocol Version: 3.0

12 Sponsor: Cleveland Clinic Foundation

13 Funding Agency: PCORI (Patient Centered Outcomes Research Institute)

14 Principal Investigator: Amit Anand, MD

15

16

17

18

19

20

21

22

23

24

25

26

27

28

29

This investigational protocol contains confidential information for use by the principal investigators and their designated representatives participating in this clinical investigation. It should be held confidential and maintained in a secure location. It should not be copied or made available for review by any unauthorized person or firm.

30 **Signature Page**

31

32 Study Title:

33

34 **ELEKT D:** Electroconvulsive therapy (ECT) vs. ketamine in patients with treatment resistant  
35 depression (TRD)

36

37 Version date: 02FEB2017

38 Protocol Version: 3.0

39

40 I, the undersigned, have read and approve this protocol and agree on its contents. It is confirmed  
41 that the information and guidance given in this protocol complies with scientific principles, the  
42 guidelines of Good Clinical Practice, the Declaration of Helsinki in the latest relevant version, and  
43 the applicable legal and regulatory requirements.

44

45

46

47

48 Principal Investigator

49 Signature



50

51

52 Amit Anand, MD

53

54

55

56

57 02FEB2017

58

59 Date

60 **Table of Contents**

61

62 **1 Table of Contents**

|    |                                                                                     |           |
|----|-------------------------------------------------------------------------------------|-----------|
| 63 | <b>1. Introduction</b> .....                                                        | <b>11</b> |
| 64 | <b>2. Background and Rationale</b> .....                                            | <b>11</b> |
| 65 | <b>3. Study Design</b> .....                                                        | <b>12</b> |
| 66 | <b>4. Outcome Measures</b> .....                                                    | <b>13</b> |
| 67 | 4.1 Primary Outcome.....                                                            | 13        |
| 68 | 4.2 Secondary Outcomes .....                                                        | 14        |
| 69 | <b>5. Subject Selection</b> .....                                                   | <b>14</b> |
| 70 | 5.1 Recruitment of Trial Participants .....                                         | 14        |
| 71 | 5.2 Inclusion Criteria .....                                                        | 14        |
| 72 | 5.3 Exclusion Criteria .....                                                        | 15        |
| 73 | 5.4 Randomization of Patients.....                                                  | 15        |
| 74 | <b>6. Study Treatments</b> .....                                                    | <b>16</b> |
| 75 | 6.1 Acute Treatment Phase (To occur over 3 to 5 weeks) .....                        | 16        |
| 76 | 6.1.1 ECT Arm .....                                                                 | 16        |
| 77 | 6.1.2 Ketamine Arm .....                                                            | 16        |
| 78 | 6.2 Assessment for Response during Acute Treatment Phase.....                       | 17        |
| 79 | 6.2.1 Responders .....                                                              | 17        |
| 80 | 6.2.2 Non Responders .....                                                          | 17        |
| 81 | 6.3 Concomitant Medication .....                                                    | 17        |
| 82 | 6.3.1 Medications Allowed During Study.....                                         | 17        |
| 83 | 6.3.2 Prohibited Medications.....                                                   | 17        |
| 84 | <b>7. Study Procedures</b> .....                                                    | <b>18</b> |
| 85 | 7.1 Screening Visit (To occur within 28 days of referral for clinical ECT) .....    | 18        |
| 86 | 7.1.1 Screen Failures.....                                                          | 19        |
| 87 | 7.2 Baseline Visit/Visit 1 (To occur within 1 week after the Screening Visit) ..... | 19        |
| 88 | 7.3 Treatment Visits (To occur over 3 to 5 weeks) .....                             | 20        |
| 89 | 7.3.1 ECT Arm .....                                                                 | 20        |
| 90 | 7.3.2 Ketamine Arm .....                                                            | 20        |
| 91 | <b>7.3.3 Completion and/or Early Termination of Treatment Phase</b> .....           | <b>21</b> |
| 92 | 7.4 End of Treatment (EOT) Visit.....                                               | 21        |
| 93 | 7.5 Follow Up Visits for Responders.....                                            | 23        |
| 94 | 7.5.1 Month 1 Follow Up Visit (+/ 2 weeks).....                                     | 23        |
| 95 | 7.5.2 Month 3 Follow Up Visit (+/ 2 weeks).....                                     | 23        |
| 96 | 7.5.3 Month 6 Follow Up Visit (+/ 2 weeks).....                                     | 24        |

|     |                                                                |           |
|-----|----------------------------------------------------------------|-----------|
| 97  | 7.6 Non Compliance .....                                       | 25        |
| 98  | 7.7 Subject Withdrawal .....                                   | 25        |
| 99  | 7.8 Lost to Follow Up.....                                     | 25        |
| 100 | 7.9 Study Termination .....                                    | 26        |
| 101 | <b>8. Safety Monitoring and Reporting .....</b>                | <b>26</b> |
| 102 | 8.1 Unexpected Adverse Events .....                            | 26        |
| 103 | 8.2 Study Treatment Discontinuation Adverse Events.....        | 27        |
| 104 | 8.3 Serious Adverse Events .....                               | 27        |
| 105 | 8.4 Documentation and Reporting of Serious Adverse Events..... | 27        |
| 106 | <b>9. Statistical Plan .....</b>                               | <b>28</b> |
| 107 | <b>10. Study Committees.....</b>                               | <b>28</b> |
| 108 | <b>11. Data Handling and Record Keeping .....</b>              | <b>29</b> |
| 109 | 11.1 Data Collection .....                                     | 29        |
| 110 | 11.2 Retention of Records.....                                 | 29        |
| 111 | <b>12. Study Monitoring, Auditing, and Inspecting .....</b>    | <b>30</b> |
| 112 | <i>Study Monitoring Plan .....</i>                             | <i>30</i> |
| 113 | <b>13. Ethical Considerations.....</b>                         | <b>30</b> |
| 114 | <b>14. Publication and Disclosure.....</b>                     | <b>31</b> |
| 115 | <b>15. References.....</b>                                     | <b>32</b> |
| 116 | <b>16. Appendix.....</b>                                       | <b>33</b> |
| 117 | <i>List of Questionnaires Schedules of</i>                     |           |
| 118 | <i>Events</i>                                                  |           |

119 **List of Abbreviations**  
 120  
 121

|             |                                                                             |
|-------------|-----------------------------------------------------------------------------|
| AE          | Adverse Event                                                               |
| ATHF        | Antidepressant Treatment History Form                                       |
| BCM         | Baylor College of Medicine                                                  |
| BPRS        | Brief Psychiatric Rating Scale                                              |
| GCI S/CGI I | Clinical Global Impression Scale for Severity and Improvement               |
| CCBH        | Cleveland Clinic Center for Behavioral Health                               |
| CNRU        | Clinical Neuroscience Research Unit (Yale)                                  |
| COWAT       | Controlled Oral Word Association Test                                       |
| CSSRS       | Columbia Suicide Severity Rating Scale                                      |
| C5R         | C5Research (Cleveland Clinic)                                               |
| CADSS       | Clinician Administered Dissociative Symptoms Scale                          |
| CPFQ        | Cognitive and Physical Functioning Questionnaire                            |
| DSMB        | Data Safety Monitoring Board                                                |
| DSM 5       | Diagnostic and Statistical Manual of Mental Disorders (5 <sup>th</sup> Ed.) |
| ECT         | Electroconvulsive Therapy                                                   |
| eCRF        | Electronic Case Report Form                                                 |
| EOT         | End of Treatment                                                            |
| EC          | Executive Committee                                                         |
| GSE My      | Global Self Evaluation of Memory                                            |
| HVLT R      | Hopkins Verbal Learning Test                                                |
| IRB         | Institutional Review Board                                                  |
| ITT         | Intent to Treat                                                             |
| MADRS       | Montgomery Asberg Depression Rating Scale                                   |
| MAOI        | Monoamine Oxidase Inhibitor                                                 |
| MAP         | Mt. Sinai Mood and Anxiety Disorders Program                                |
| MINI 7.0    | Mini Neuropsychiatric Interview                                             |
| MoCA        | Montreal Cognitive Assessment                                               |
| MDD         | Major Depressive Disorder                                                   |
| MSSM        | Mount Sinai Medical Center                                                  |
| NAART       | North American Adult Reading Test                                           |
| PGIC/PGII   | Patient Global Impression Scale                                             |
| PRISE       | Patient Rated Inventory of Side Effects                                     |
| QIDS SR 16  | Quick Inventory of Depressive Symptoms                                      |
| QOLS        | Quality of Life Scale                                                       |
| SAE         | Serious Adverse Event                                                       |
| SAP         | Statistical Analysis Plan                                                   |
| SC          | Stakeholder Committee                                                       |

|  |  |
|--|--|
|  |  |
|--|--|

122

|      |                                        |
|------|----------------------------------------|
| SOC  | Standard of Care                       |
| SMCQ | Squire Memory Complaint Questionnaire  |
| SSRI | Selective Serotonin Reuptake Inhibitor |
| TRD  | Treatment Resistant Depression         |
| YMRS | Young Mania Rating Scale               |

123 **Study Synopsis**  
124

|                     |                                                                                                                                                                                                                                                                                                                                                                                                                                                                                                                                                                                                                                                                  |
|---------------------|------------------------------------------------------------------------------------------------------------------------------------------------------------------------------------------------------------------------------------------------------------------------------------------------------------------------------------------------------------------------------------------------------------------------------------------------------------------------------------------------------------------------------------------------------------------------------------------------------------------------------------------------------------------|
| Title               | ELEKT D: Electroconvulsive therapy (ECT) vs. ketamine in patients with treatment resistant depression (TRD)                                                                                                                                                                                                                                                                                                                                                                                                                                                                                                                                                      |
| Sponsor             | Cleveland Clinic Foundation                                                                                                                                                                                                                                                                                                                                                                                                                                                                                                                                                                                                                                      |
| Funding Source      | PCORI (Patient Centered Outcomes Research Institute)                                                                                                                                                                                                                                                                                                                                                                                                                                                                                                                                                                                                             |
| Study Centers       | There will be approximately four study sites located throughout the U.S.                                                                                                                                                                                                                                                                                                                                                                                                                                                                                                                                                                                         |
| Patient Population  | Outpatients or inpatients with non psychotic TRD referred by their clinical providers and eligible for ECT treatment.                                                                                                                                                                                                                                                                                                                                                                                                                                                                                                                                            |
| Study Objectives    | <p>The aim of the study is to conduct a comparative randomized trial of ECT versus ketamine for TRD in a real world setting with patient reported outcomes as primary and secondary outcome measures.</p> <p><b>Specific Aim 1:</b> To investigate the comparative effectiveness of ECT and ketamine on measures of depression.</p> <p><b>Specific Aim 2:</b> To investigate the relative impact of ECT and ketamine on measures of memory and cognitive function.</p> <p><b>Specific Aim 3:</b> To investigate the relative impact of ECT and ketamine on patient reported quality of life measures after acute treatment and at follow up over six months.</p> |
| Study Design        | <p>This is an unblinded prospective randomized open label clinical trial. Patients will be randomized 1:1 to receive either ECT 3 times per week or ketamine 2 times per week over 3 weeks (additional 2 week window allowed for flexibility).</p> <p>Responders (patients who achieve a 50% decrease on the QIDS SR 16 score from Baseline to the End of Treatment visit) will return for three follow up visits over a six month period following the end of treatment visit. Non responders will not be followed after the End of Treatment visit.</p>                                                                                                        |
| Number of Patients  | <p>Approximately 400 eligible subjects will be enrolled, 200 in the ECT arm and 200 in the ketamine arm.</p> <p>It is estimated that 60% or 240 patients (approximately 120 in each arm) will be classified as responders. Due to the expected high level of attrition, 192 patients classified as responders (approximately 96 in each arm) are expected to complete the follow up visits.</p>                                                                                                                                                                                                                                                                  |
| Duration of patient | The screening period will be a maximum of 28 days. Randomization will occur within 1 week after the screening period after eligibility is confirmed.                                                                                                                                                                                                                                                                                                                                                                                                                                                                                                             |



|                                                |                                                                                                                                                                                                                                                                                                                                                                                                                                                                                                                                                                                                                                                                                                                                                                                                                                                                                                                                                                                                                                                                                                                                                                                                                                                                                                                                                                                                                                                                                                                                                                                                                                                                                                                                                                                                                                                                                                                    |
|------------------------------------------------|--------------------------------------------------------------------------------------------------------------------------------------------------------------------------------------------------------------------------------------------------------------------------------------------------------------------------------------------------------------------------------------------------------------------------------------------------------------------------------------------------------------------------------------------------------------------------------------------------------------------------------------------------------------------------------------------------------------------------------------------------------------------------------------------------------------------------------------------------------------------------------------------------------------------------------------------------------------------------------------------------------------------------------------------------------------------------------------------------------------------------------------------------------------------------------------------------------------------------------------------------------------------------------------------------------------------------------------------------------------------------------------------------------------------------------------------------------------------------------------------------------------------------------------------------------------------------------------------------------------------------------------------------------------------------------------------------------------------------------------------------------------------------------------------------------------------------------------------------------------------------------------------------------------------|
| <p>participation and duration of the study</p> | <p>After patients are enrolled they will be randomized to either ECT or ketamine therapy. Patients in the ECT arm will receive up to 9 treatments over 3 weeks (+ 2 weeks). Patients in the ketamine arm will receive up to 6 treatments over 3 weeks (+ 2 weeks).</p> <p>Patients in both arms classified as responders will have 3 additional visits, at 1 month, 3 months, and 6 months after the End of Treatment visit. Responders are patients who achieve a 50% decrease in QIDS SR score from Baseline to the End of Treatment visit.</p>                                                                                                                                                                                                                                                                                                                                                                                                                                                                                                                                                                                                                                                                                                                                                                                                                                                                                                                                                                                                                                                                                                                                                                                                                                                                                                                                                                  |
| <p>Key Selection Criteria</p>                  | <p><b>INCLUSION CRITERIA</b></p> <ol style="list-style-type: none"> <li>1. Written informed consent before any study related procedures are performed</li> <li>2. Inpatients or outpatients referred by their providers for ECT treatment and eligible for ECT treatment</li> <li>3. Males/females at least 21 years of age but no older than 75 years of age</li> <li>4. Meet DSM 5 criteria for Major Depressive Episode in a as determined by both:       <ol style="list-style-type: none"> <li>A. clinician's diagnostic evaluation and</li> <li>B. confirmed with the MINI International Neuropsychiatric Interview (MINI 7.0)</li> </ol> </li> <li>5. A current depressive episode that has lasted a minimum of 4 weeks</li> <li>6. Meet all of the following criteria on symptom rating scales at screening:       <ol style="list-style-type: none"> <li>A. Montgomery Asberg Depression Rating Scale (MADRS) score &gt;20</li> <li>B. Young Mania Rating Scale (YMRS) of 5</li> <li>C. Montreal Cognitive Assessment (MoCA) of 18</li> </ol> </li> <li>7. Have had 2 adequate trials of antidepressants or augmentation strategies during their lifetime (Refer to ATHF Guidelines for Completion for guidelines on dose/duration required for a trial to be considered adequate.)</li> <li>8. In the opinion of the investigator, the patient is willing and able to comply with scheduled visits, treatment plan, and other trial procedures for the duration of the study</li> </ol> <p><b>EXCLUSION CRITERIA</b></p> <ol style="list-style-type: none"> <li>1. Meet DSM 5 criteria for bipolar disorder, schizophrenia, schizophreniform disorder, schizoaffective disorder, mental retardation, or pervasive developmental disorder</li> <li>2. Meets any exclusion criteria for ECT or ketamine treatment as described in the clinical guidelines or according to investigator judgment</li> </ol> |

|                                                |                                                                                                                                                                                                                                                                                                                                                                                                                                                                                                                                                                                                                                                                                                                                                                                                                                                                                                                                                                                                                                                                                                                                                                                                                                   |
|------------------------------------------------|-----------------------------------------------------------------------------------------------------------------------------------------------------------------------------------------------------------------------------------------------------------------------------------------------------------------------------------------------------------------------------------------------------------------------------------------------------------------------------------------------------------------------------------------------------------------------------------------------------------------------------------------------------------------------------------------------------------------------------------------------------------------------------------------------------------------------------------------------------------------------------------------------------------------------------------------------------------------------------------------------------------------------------------------------------------------------------------------------------------------------------------------------------------------------------------------------------------------------------------|
|                                                | <ol style="list-style-type: none"> <li>3. The patient is pregnant or breast feeding</li> <li>4. The patient has a severe medical illness or severe neurological disorder</li> <li>5. The patient has a known ketamine allergy or is taking a medication that may interact with ketamine</li> <li>6. Diagnosis of major depressive disorder with psychotic features during the current depressive episode</li> <li>7. Unable to give informed consent</li> <li>8. Was previously enrolled/randomized into the trial</li> </ol>                                                                                                                                                                                                                                                                                                                                                                                                                                                                                                                                                                                                                                                                                                     |
| Test Product, Dose, and Mode of Administration | <p>ECT:<br/> Patients randomized to the ECT arm will receive standardized ECT treatment as determined by each study site. The starting ECT treatment will be Right Unilateral (RUL) ultra brief pulse at 6X seizure threshold determined during titration at the first visit. After RUL for four to six treatments, if there is not satisfactory improvement, there will be a switch to Bilateral (BL) utilizing brief pulse using 0.5 modified half age method to determine stimulus intensity.</p> <p>Anesthesia will be administered according to standard of care at each site, but ketamine will not be allowed. Patients will receive up to nine treatments over 3 weeks (additional 2 week window allowed for flexibility).</p> <p>Flexibility will be allowed for the clinician to adjust the treatment as clinically necessary.</p> <p>Ketamine:<br/> The standard dose of ketamine (0.5mg/kg infusion over 40 minute period) will be administered 2 times per week over 3 weeks (additional 2 week window allowed for flexibility). The investigator will be able to adjust the dose if clinically warranted.</p> <p>Flexibility will be allowed for the clinician to adjust the treatment as clinically necessary.</p> |
| Concomitant Medications                        | <p>All patients will continue their existing antidepressant treatment while on the study protocol. Patients will also continue existing non psychotropic medications initiated prior to the baseline visit, unless the investigator determines that they are contraindicated for ECT or ketamine treatment. Each site will follow their standard clinical protocol for this.</p> <p>Investigators will follow their site's standard safety evaluation process for anesthesia administration and ECT.</p>                                                                                                                                                                                                                                                                                                                                                                                                                                                                                                                                                                                                                                                                                                                          |
| Prohibited Medications                         | <p>Any medication that is judged by the investigator to have significant clinical interaction with ECT or ketamine.</p>                                                                                                                                                                                                                                                                                                                                                                                                                                                                                                                                                                                                                                                                                                                                                                                                                                                                                                                                                                                                                                                                                                           |

|                            |                                                                                                                                                                                                                                                                                                                                                                                                                                                                                                                                                                                                                                                                                                                                                     |
|----------------------------|-----------------------------------------------------------------------------------------------------------------------------------------------------------------------------------------------------------------------------------------------------------------------------------------------------------------------------------------------------------------------------------------------------------------------------------------------------------------------------------------------------------------------------------------------------------------------------------------------------------------------------------------------------------------------------------------------------------------------------------------------------|
| Outcome Measures           | The primary outcome measure is response rate, defined as 50% reduction in QIDS SR16 scores from Baseline Visit to the End of Treatment Visit.                                                                                                                                                                                                                                                                                                                                                                                                                                                                                                                                                                                                       |
| Secondary Outcome Measures | Secondary outcome measures will include clinician and patient rated scales for depression, suicidality, cognition, and associated psychiatric symptoms.                                                                                                                                                                                                                                                                                                                                                                                                                                                                                                                                                                                             |
| AE/ SAE Collection         | <p><b>SAEs will be reported to the sponsor and the respective site IRB within 24 hours of notification of the event.</b></p> <p>SAEs<br/> Death<br/> Life threatening AEs (including suicide attempt)<br/> A new inpatient hospitalization or prolongation of existing hospitalization.<br/> A disability/incapacity<br/> A congenital anomaly/birth defect in the offspring of a patient who received drug<br/> Other Serious Event (Important Medical Event) an important medical event that may jeopardize the subject or may require medical intervention to prevent one of the outcomes listed above. Medical and scientific judgment should be exercised in deciding whether other situations should be considered serious adverse event.</p> |
| Statistical Methodology    | The primary analyses will be performed on the modified intention to treat (mITT) population defined as a randomized patient having at least one treatment and one QIDS SR16 measurement during the acute treatment phase. The primary outcome measure of response rate will be compared between ketamine and ECT using a chi square test, to test the comparative efficacy of ketamine and ECT for reduction in depressive symptoms. A multivariable logistic regression model will be constructed for the analysis, to account for potential heterogeneity of treatment effect caused by confounding variables. A similar analytic strategy will be applied to evaluate cognitive function and quality of life.                                    |

## 1. Introduction

Major depressive disorder (MDD) accounts for 65.5 million disability adjusted life years (DALYs) and ranks third among illnesses of global disease burden (1). Identifying treatments that are more effective for MDD is required to meet this large and growing public health challenge. However, recent data suggest that antidepressant therapies are less efficacious than previously thought (2, 3). The real world effectiveness of antidepressants is sub optimal in approximately two of three patients (4, 5). TRD has been defined as depression resistant to one or more adequate trials of antidepressants for which the patient reports minimal or no significant improvement in mood (6, 7). TRD has been noted to be present in 20-50% of depression patients. TRD patients have significantly higher outpatient costs and a six higher cost of hospitalization (8). Chronic, inadequately treated depression is associated with loss of social and workplace functioning, increased medical illnesses and healthcare use, and an increased risk for suicide (6). In the United States, the total economic cost of depression in 2012 was estimated at \$188 billion (6). Hence, there is an urgent need to identify treatments that can be effective for TRD.

## 2. Background and Rationale

### ECT Use in TRD

ECT has been in use for nearly 75 years for severe TRD and is considered to be one of the most effective treatments (9). However it is associated with a number of side effects and social stigma.

Cognitive impairment and significant memory loss has been observed in unilateral and bilateral as well as higher dose ECT immediately after treatment (10). Additional adverse events associated with ECT include anterograde amnesia (i.e. memory disturbance of events after ECT treatment) in the short term and retrograde amnesia (memory disturbance of events before ECT treatment) in the long term. Retrograde amnesia can persist for years after ECT treatment particularly for events near the time of treatment (11).

Other side effects of ECT include risks of receiving general anesthesia and muscle relaxants, delirium in the post ECT period, headaches and muscle aches, nausea and fatigue and rarely, prolonged seizures.

### Ketamine as an Alternative Treatment for TRD

Ketamine shows promise as a treatment for TRD, but there is an evidence gap in its use as an alternative to ECT. Ketamine is a sedative/analgesic and general anesthetic approved by the FDA for human and veterinary use. It is an antagonist of the N-methyl D-aspartate (NMDA) receptors in the brain and decreases the neurotransmission of glutamate (the main excitatory neurotransmitter) via the NMDA receptor.

163 Single infusion of a subanesthetic dose of ketamine has shown rapid but transient reversal of TRD  
164 symptoms. A number of open label studies done so far indicate that repeated ketamine infusion  
165 treatment results in responses similar to that of ECT (40). Ketamine can lead to symptoms of  
166 dissociation, perceptual disturbances, or even psychotic like symptoms (33) although these are  
167 seen infrequently at subanesthetic doses used in the treatment of TRD and are rapidly reversed  
168 after stopping the infusion.

169 Currently, there are no formal randomized trials with detailed clinical and demographic data to  
170 provide direct comparative efficacy evidence between ECT and ketamine treatment. This study  
171 will provide such data and help to fill the evidence gap for efficacy of ECT and ketamine  
172 treatment for TRD.

### 173 3. Study Design

174 This is a prospective randomized open label 2 arm (1:1) clinical trial of TRD with either ECT or  
175 ketamine treatment. Given the nature of ketamine and ECT treatments randomization and  
176 treatment arms cannot be blinded at the clinician or patient level.

177 After screening and evaluation of inclusion/exclusion criteria, patients will be randomized to  
178 either ECT three times per week or ketamine two times per week. This acute treatment phase  
179 will last between three to five weeks. This timeframe allows for changes in the treatment  
180 schedule due to clinician discretion or the patient's schedule. Patients may respond or remit to ECT  
181 or ketamine before they have completed all treatment visits and therefore may not undergo the  
182 full nine visits (for ECT) or six visits (for ketamine). Investigators will closely monitor patients and  
183 may adjust treatments during the acute treatment phase at any time. All patients, regardless of  
184 how many treatment visits have been completed, should complete an End of Treatment Visit.

185  
186 All patients will complete self reported cognitive assessments, depression questionnaires, and  
187 quality of life scales at the Baseline Visit and throughout the acute treatment phase of the study  
188 (see Schedule of Events). Diagnostic interviews and clinician rated scales will also be performed at  
189 regular intervals throughout the acute treatment phase.

190 After the acute treatment phase, all patients will complete an end of treatment (EOT) visit within  
191 one week of their last study treatment and will be classified as either a responder or a non  
192 responder. Patients may continue to receive ECT or ketamine clinically after the EOT visit, but  
193 this will mark the end of the acute treatment phase of the study. If the patient is a responder any  
194 ECT or ketamine treatments administered after the EOT visit will be recorded in the follow up  
195 phase. If the patient is not a responder this will conclude their participation in the study and they  
196 will be treated clinically.

197 • Responder: a patient who achieves a  $\geq 50\%$  decrease in their QIDS SR 16  
198 score from Baseline to the End of Treatment visit. Responders will continue in the study for  
199 three follow up visits at one month, three months, and six

200 months after the EOT Visit. They will continue naturalistic treatment with a clinician of their choice.  
 201 • Non responder: a patient who achieves <50% decrease in their QIDS SR 16  
 202 score from Baseline to the End of Treatment Visit. Non responders will be exited from the  
 203 study after the End of Treatment Visit and will not be seen for follow up visits. They will  
 204 continue treatment with the clinician of their choice

#### 205 206 Early Completion of Acute Treatment Phase

207 The investigator or patient can choose to stop treatment at any time. Investigators will monitor  
 208 patients closely for signs of improvement, remission, or decline. The investigator will use his or  
 209 her discretion and clinical judgment to determine if a patient should stop treatment and be  
 210 scheduled for an End of Treatment Visit.

211  
 212 Investigators may decide to stop treatment for patients who show improvement after less than  
 213 nine ECT treatments or six ketamine treatments. These patients should be scheduled for an End of  
 214 Treatment Visit and if they are found to be responders will participate in the  
 215 follow up visits.

216 Investigators may also decide to stop treatment for patients who decline or have worsening  
 217 depression or suicidality during the acute treatment phase. These patients should be scheduled for  
 218 an End of Treatment Visit and be evaluated for response. (These patients are unlikely to be  
 219 classified as responders.)

220  
 221 If an outpatient has worsening depression that requires psychiatric hospitalization, the patient  
 222 may continue in the study at investigator discretion. These patients can receive study ECT or  
 223 ketamine treatments as an inpatient.

## 224 **4. Outcome Measures**

225 To avoid potential bias, the patient assessments and the clinician assessments should be  
 226 completed independently and without reference to one another. The research coordinator or  
 227 clinician administering the questionnaires should not view the patient's responses on patient  
 228 rated scales. (They should, however, remind the patient to answer all questions and not leave any  
 229 questions blank.)

### 230 **4.1 Primary Outcome**

231  
 232 The primary outcome measure is the percent of responders. Treatment response is defined as a  
 233  $\geq 50\%$  decrease in QIDS SR 16 scores from the Baseline Visit to the EOT visit

234 The QIDS SR 16 will be administered prior to treatment according to the following schedules. ECT

235 Arm

236 QIDS SR 16 will be administered at certain time points during the acute treatment phase  
 237 (Baseline/Visit 1, Visit 2, Visit 4, Visit 6, Visit 7, and Visit 9, EOT visit) Patients in the ECT arm who  
 238 are classified as responders will complete the QIDS SR 16 at all follow up visits.

239 Ketamine Arm

240 The QIDS SR 16 will be administered at all visits during the acute treatment phase  
 241 (Baseline/Visit 1, Visit 2, Visit 3, Visit 4, Visit 5, Visit 6, EOT visit). Patients in the ketamine arm  
 242 who are classified as responders will complete the QIDS SR 16 at all follow up visits.

243  
 244 This scale should be the first assessment administered and should be checked for completeness  
 245 by the study nurse or research coordinator. All attempts should be made to have a consistent and  
 246 neutral atmosphere for the patient to complete the QIDS and all patient rated scales to minimize  
 247 outside influence.

248

249

**4.2 Secondary Outcomes**

250 Other patient and clinician rated scales will be used as secondary outcome measurements. (See  
 251 Table 1.)

252 All scales (except CADSS and BPRS) will be administered prior to treatment. CADSS and BPRS will  
 253 be administered by the research nurse or a clinician post treatment. Questionnaires will be  
 254 administered according to the schedule of events.

255

256 During the follow up visits, data analysis for time points 1, 3, and 6 months will be conducted using  
 257 the End of Treatment Visit as baseline.

258 **5. Subject Selection**

259

260

**5.1 Recruitment of Trial Participants**

261 Inpatients or Outpatients with non psychotic TRD referred by their clinical providers for ECT and  
 262 found to be eligible for ECT treatment will be pre screened for the study. Potential patients will  
 263 be approached after a psychiatrist has evaluated them and recommended them for clinical ECT  
 264 treatment. At this time the patient will be informed about the study and given a thorough  
 265 explanation of risks, benefits, study procedures, and expectations.

266 Patients interested in participation will be scheduled for a screening visit within 2 weeks (but  
 267 ideally as soon as possible)

268

269

**5.2 Inclusion Criteria**

270 Patients are eligible for the study if they meet the following inclusion criteria:

271

272 a) Written informed consent before any study related procedures are performed

- 273 b) Inpatients or outpatients referred by their providers for ECT treatment and eligible for  
 274 ECT treatment
- 275 c) Males or females at least 21 years of age, but no older than 75 years of age
- 276 d) Meet DSM 5 criteria for a Major Depressive Episode as determined by both:  
 277 A. a clinician's diagnostic evaluation and  
 278 B. confirmed by interview using the Mini International Neuropsychiatric  
 279 Interview (MINI)
- 280 e) A current depressive episode that has lasted a minimum of 4 weeks
- 281 f) Meet all of the following criteria on symptom rating scales at screening  
 282 A. Montgomery Asberg Depression Rating Scale (MADRS) score > 20  
 283 B. Young Mania Rating Scale (YMRS) ≤ 5  
 284 C. Montreal Cognitive Assessment (MoCA) of ≥ 18
- 285 g) Have had ≥ 2 adequate trials of antidepressants/augmentation strategies during their  
 286 lifetime. (Refer to ATHF Guidelines for Completion for guidelines on dose/duration  
 287 required for a trial to be considered adequate.)
- 288 h) In the opinion of the investigator, the patient is willing and able to comply with  
 289 scheduled visits, treatment plan, and other trial procedures for the duration of the study

290

### **5.3 Exclusion Criteria**

291 Patients must NOT meet any of the following exclusion criteria:

- 292 a) Meets DSM 5 criteria for bipolar disorder, schizophrenia, schizophreniform disorder,  
 293 schizoaffective disorder, mental retardation, or pervasive development disorder
- 294 b) Meet any exclusion criteria for ECT or ketamine treatment as described in the clinical  
 295 guidelines or according to investigator judgment
- 296 c) The patient is pregnant or breast feeding
- 297 d) The patient has a severe medical illness or severe neurological disorder
- 298 e) The patient has a known ketamine allergy or is taking any medication that may interact  
 299 with ketamine
- 300 f) Diagnosis of major depressive disorder with psychotic features during the current  
 301 depressive episode
- 302 g) Unable to give informed consent
- 303 h) Was previously enrolled/randomized into the trial.

304

### **5.4 Randomization of Patients**

305 All patients who are eligible for the trial will be randomized in a 1:1 fashion to either ECT or  
 306 ketamine treatment. Given the nature of these treatments, treatment arms cannot be blinded at  
 307 the patient or clinician level. Randomization will be conducted centrally through a secure  
 308 electronic data management system. Detailed instructions can be found in the Manual of  
 309 Operations (MOP).



310 **6. Study Treatments**

311

312

**6.1 Acute Treatment Phase (To occur over 3 to 5 weeks)**

313 **6.1.1 ECT Arm**

314 Patients will undergo anesthesia evaluation according to each site's standard clinical procedure.  
315 Anesthesia will be administered according to standard of care at each site, but ketamine will not be  
316 allowed.

317

318 The initial ECT treatment will be Right Unilateral (RUL) ultra brief pulse at 6X seizure threshold  
319 determined during titration at first visit. If there is not satisfactory improvement with RUL the  
320 investigator may change to Bilateral (BL) utilizing brief pulse using 0.5 modified half age method  
321 to determine stimulus intensity. The seizure threshold may increase during the course of  
322 treatment and the dose of the electric stimulus may need to be increased incrementally (16). It is  
323 suggested to change to bilateral after three to five RUL treatments (17).

324 Treatments will be given three times a week and after 9 treatments the acute arm of the study  
325 would be complete. Flexibility will be allowed for the ECT clinician to adjust the treatments as  
326 clinically necessary.

327

328 Patients will receive up to nine treatments over three to five weeks. Ideally patients will receive  
329 treatments at regular intervals of three times per week for three weeks. The window allows for  
330 modifications based on clinician discretion and the patient's schedule.

331 Patients will be assessed by clinical providers prior to each visit to evaluate treatment response and  
332 appropriateness for continued treatment. Patients will be assessed for any adverse events and  
333 treated per investigator discretion.

334 Patients will receive both patient rated and clinician rated behavioral scales at Baseline/Visit 1,  
335 Visit 2, Visit 4, Visit 6, Visit 7, Visit 9, and EOT Visit.

336 **6.1.2 Ketamine Arm**

337 Patients will receive up to six treatments over three to five weeks. Ideally patients will receive  
338 treatments at regular intervals of two times per week for three weeks. The window allows for  
339 modifications based on clinician discretion and patient schedules.

340 Ketamine will be administered according to the standard dose of 0.5mg/kg infusion over a 40 min  
341 period).The investigator will be able to modify the dose if clinically warranted.

342 Treatments will be given two times a week for a maximum of six treatments after which the acute  
343 arm of the study will be complete.

344 Patients will be clinically assessed prior to each treatment to evaluate response and  
345 appropriateness for continued treatment. Patients will be assessed for any adverse events and  
346 treated per investigator discretion.

347 Patients will receive both patient rated and clinician rated behavioral scales at all treatment visits  
348 (Baseline/Visit 1, Visit 2, Visit 3, Visit 4, Visit 5, Visit 6, and EOT Visit).

## 349 **6.2 Assessment for Response during Acute Treatment Phase**

### 350 **6.2.1 Responders**

351 Patients who have a decrease of 50% or more on the QIDS SR 16 from Baseline Visit to the EOT  
352 Visit will be classified as a responder. These patients will be included in the six month follow up  
353 phase.

354 The clinician may decide to stop treatment before the maximum number of visits and  
355 schedule the patient for an EOT Visit.

### 356 **6.2.2 Non Responders**

357 Patients who have less than a 50% decrease in QIDS SR 16 score from the Baseline Visit to the  
358 EOT Visit will be classified as non responders. These patients will not be included in the follow up  
359 portion of the trial. Patients will be referred to their clinical provider for ongoing treatment of  
360 depression. Continuity of care between study staff and clinical providers will be carefully  
361 managed in order to provide optimal ongoing psychiatric care for the patient.

## 362 **6.3 Concomitant Medication**

### 364 **6.3.1 Medications Allowed During Study**

365 Patients will be allowed to continue their existing psychotropic medications. Changes in  
366 psychotropic medications throughout the trial are best avoided but are permitted according to  
367 investigator discretion. These medications must be recorded on the psychiatric concomitant  
368 medication log.

369  
370 Subjects should continue medications for other conditions and be reminded to tell study staff of  
371 any changes to medical history or concomitant medications. This will be assessed at each visit  
372 prior to treatment. All subjects should receive optimal care for any side effects occurring during  
373 the study (nausea, headache, etc.) according to local standards of care or evidence based  
374 guidelines, and at the discretion of the investigator.

### 375 **6.3.2 Prohibited Medications**

376 Patients should not be enrolled in the study if they are taking any medication that is contraindicated  
377 for ECT or ketamine treatment.

378  
379 Changes in medical history and concomitant medications will be assessed at each visit and patients  
380 may be withdrawn from the study at any point if they are taking prohibited medication.

381 **7. Study Procedures**

382  
383 **7.1 Screening Visit (To occur within 28 days of referral for clinical ECT)**

- 384
- 385 ● Informed Consent: An investigator and/or other delegated study team member will
  - 386 discuss all risks and benefits of participation and review the study visit schedule with the patient.
  - 387 The patient will sign the informed consent form prior to any study procedures being performed.
  - 388 ● Assessment of Inclusion/Exclusion Criteria
  - 389 ● Demographics
  - 390 ● Medical History, including psychiatric history and history of neurological conditions
  - 391 ● Psychiatric Medication Log (current medications)
  - 392 ● Clinical Psychiatric Evaluation
  - 393 ● Diagnostic evaluation by investigator
    - 394 ○ Meets DSM 5 criteria for MDD, but does not meet DSM 5 criteria for
    - 395 Schizophrenia, Schizophreniform disorder, schizoaffective disorder, mental
    - 396 retardation, Pervasive Development Disorder
    - 397 ○ No psychotic episodes during the current depressive episode
    - 398 ○ Verify current depressive episode has lasted at least 4 weeks
    - 399 ○ Verify that patient has had at least 2 adequate (Refer to ATHF Guidelines for
    - 400 Completion for guidelines on dose/duration required for a trial to be considered
    - 401 adequate.) trials of antidepressant therapy
  - 402 ● Urine pregnancy test for females of child bearing potential
  - 403 ● Diagnostic Interviews
    - 404 ○ MINI
    - 405 ○ ATHF
  - 406 ● Clinician Rated Scales
    - 407 ○ MADRS
    - 408 ○ YMRS
  - 409 ● Cognitive Assessments
    - 410 ○ MoCA

411 If patients meet eligibility criteria they will be randomized into either the ECT or ketamine arm via  
412 a secure electronic data management system. Randomization can be done by study staff after the  
413 screening visit. Depending on which arm the patient is randomized to, the study nurse will  
414 schedule them for their Baseline/Visit 1 according to the site's clinical or research schedule.

415 Study staff should schedule patients for their Baseline/Visit 1 within one week of the Screening  
416 Visit.

417 **7.1.1 Screen Failures**

418 If the patient fails to qualify for the study after signing the informed consent form, they will be  
 419 considered a screen failure. Screen failures should be recorded on the electronic screening log  
 420 along with the reason for disqualification. Patients who screen fail and are not randomized will be  
 421 eligible to rescreen at a later date. Patients should only be enrolled into the study once, therefore  
 422 patients who have been randomized will not be eligible for future screening.

423

424 **7.2 Baseline Visit/Visit 1 (To occur within 1 week after the Screening Visit)**

- 425 ● Update Medical History
- 426 ● Update Psychiatric Medication Log
- 427 ● Clinical Psychiatric Evaluation
- 428 ● Vitals (BP, height, weight)
- 429 ● Evaluation for AEs and SAEs

430 **Questionnaires to be Completed Prior to Treatment** ●

- 431 Patient Rated Behavioral Scales
  - 432 ○ QIDS SR 16 (to be completed first)
  - 433 ○ SMCQ
  - 434 ○ PGIC C
  - 435 ○ QOLS
  - 436 ○ PRISE
  - 437 ○ CPFQ
- 438 ● Clinician Rate Behavioral Scales
  - 439 ○ MADRS
  - 440 ○ CSSRS
  - 441 ○ YMRS
  - 442 ○ CGI S
- 443 ● Cognitive Assessments
  - 444 ○ COWAT
  - 445 ○ HVL T R
  - 446 ○ Stroop
  - 447 ○ NAART

448 ECT Procedure or Ketamine Infusion Questionnaires to be

449 **Completed Post Treatment\***

- 450 ○ CADSS
- 451 ○ BPRS

452 \*Patients in the ECT arm will need to have a recovery period prior to completing the post  
 453 treatment questionnaires.

454

**7.3 Treatment Visits (To occur over 3 to 5 weeks)**

455

**7.3.1 ECT Arm**

456 Prior to each treatment, patients will be assessed if clinically appropriate for the treatment.

457 Components of the evaluation for ECT will vary on a case by case basis. Each site will perform the  
458 following minimal set of assessments:

459

- 460 ● Update Medical History
- 461 ● Update Psychiatric Medication Log
- 462 ● Vitals (BP, heart rate, weight)
- 463 ● Evaluation for Adverse Events or Serious Adverse Events
- 464 ● Clinical Psychiatric Evaluation
- 465 ● Patient and Clinician Rated Behavioral Scales (to be completed at Baseline/Visit 1,  
466 Visit 2, Visit 4, Visit 6, Visit 7, and Visit 9).

467 Prior to Treatment:

- 468 ● Patient Rated Behavioral Scales (to be completed at every visit)
  - 469 ○ QIDS SR 16 (to be completed first)
  - 470 ○ GSE MY
  - 471 ○ SMCQ
  - 472 ○ PGIC C & PGIC I
  - 473 ○ QOLS
  - 474 ○ PRISE
  - 475 ○ CPFQ

476 Clinician Rated Behavioral Scales

- 477 ○ MADRS
- 478 ○ CSSRS
- 479 ○ YMRS
- 480 ○ CGI S & CGI I

481

- 482 ● Post Treatment (clinician rated)
  - 483 ○ CADSS
  - 484 ○ BPRS

485

486

**7.3.2 Ketamine Arm**

487 Prior to each treatment, patients will be assessed if clinically appropriate for the treatment.

488 Components of the evaluation for Ketamine will vary on a case by case basis.

489 Each site will perform the following minimal set of assessments: ●

- 490 Update Medical History
- 491 ● Update Psychiatric Medication Log
- 492 ● Vitals (BP, heart rate, weight)

- 493 • Evaluation for Adverse Events or Serious Adverse Events
- 494 • Clinical Psychiatric Evaluation
- 495 • Patient and Clinician Rated Behavioral Scales (to be completed at every visit)

496

497 Prior to Treatment:

- 498 • Patient Rated Behavioral Scales (to be completed at every visit)
  - 499 ○ QIDS SR 16 (to be completed first)
  - 500 ○ GSE MY (not completed at Baseline/Visit 1)
  - 501 ○ SMCQ
  - 502 ○ PGI C & PGI I (PGI I not completed at Baseline/Visit 1)
  - 503 ○ QOLS
  - 504 ○ PRISE
  - 505 ○ CPFQ

- 506 • Clinician Rated Behavioral Scales (to be completed at every visit)
  - 507 ○ MADRS
  - 508 ○ CSSRS
  - 509 ○ YMRS
  - 510 ○ CGI S & CGI I (CGI I not completed at Baseline/Visit 1)

511 Post Treatment (clinician rated):

- 512 ○ CADSS
- 513 ○ BPRS

514

### 515 **7.3.3 Completion and/or Early Termination of Treatment Phase**

516

517 Investigators can end the treatment phase early, before the maximum number of treatments  
518 are completed, if:

- 519 • The clinician feels the patient has achieved a sustained remission (QIDS SR 16 score  
520 <5 on two consecutive assessments) or the clinician determines additional treatments are not  
521 clinically warranted
- 522 • The patient has worsening depression, severe psychotic symptoms, or becomes  
523 suicidal

524 If these situations occur the patient should be scheduled for an End of Treatment Visit.

525 The patient can decide not to continue treatment for any reason. They should be encouraged to  
526 complete an End of Treatment Visit.

527

528

### **7.4 End of Treatment (EOT) Visit**

529 Patients will complete an EOT visit within one week of their last study treatment. If patients do not  
530 stop treatment early, this will occur after the 9<sup>th</sup> ECT treatment or the 6<sup>th</sup> ketamine

531 treatment. If patients stop earlier, the EOT visit will occur within one week of this final treatment.  
 532 Patients may continue to receive ECT or ketamine clinically, but the EOT visit marks the end of the  
 533 acute treatment phase for the study.

534 Vitals

535 Update Medical History

536 Update Psychiatric Medication Log Evaluation for AEs  
 537 or SAEs

538 Clinical Psychiatric Evaluation

539 Patient Rated Behavioral Scales

- 540 ○ QIDS SR 16 (to be completed first)
- 541 ○ GSE MY
- 542 ○ SMCQ
- 543 ○ PGI C & PGI I
- 544 ○ QOLS
- 545 ○ PRISE
- 546 ○ CPFQ

547 Clinician Rated Behavioral Scales

- 548 ○ MADRS
- 549 ○ CSSRS
- 550 ○ YMRS
- 551 ○ BPRS
- 552 ○ CGI S & CGI I
- 553 ○ CADSS

554 Diagnostic Interviews

- 555 ○ MINI
- 556 ○ ATHF

557 ● Cognitive Assessments

- 558 ○ MoCA
- 559 ○ COWAT
- 560 ○ HVLT R
- 561 ○ Stroop

562 Patients will be classified as responders or non responders after the EOT Visit. Responders will be  
 563 patients who had a  $\geq 50\%$  decrease in their QIDS SR 16 score from Baseline/Visit 1 to the EOT  
 564 Visit. Non responders will have had  $< 50\%$  decrease in their QIDS SR 16 score from Baseline/Visit  
 565 1 to the EOT Visit.

566 Responders will be asked to participate in the follow up phase of the study. Follow up visits will  
 567 occur one month, three months, and six months after the EOT Visit.

568  
 569

## 7.5 Follow Up Visits for Responders

### 570 **7.5.1 Month 1 Follow Up Visit (+/ 2 weeks)**

571  
 572 Update Medical History  
 573 Update Psychiatric Medication Log Vitals (BP,  
 574 heart rate, weight)  
 575 Evaluation for Adverse Events or Serious Adverse Events Psychiatric Evaluation

576 Patient Rated Behavioral Scales

- 577 ○ QIDS SR 16 (to be completed first)
- 578 ○ GSE MY
- 579 ○ SMCQ
- 580 ○ PGIC C & PGIC I
- 581 ○ QOLS
- 582 ○ PRISE
- 583 ○ CPFQ

584 Clinician Rated Behavioral Scales

- 585 ○ MADRS
- 586 ○ CSSRS
- 587 ○ YMRS
- 588 ○ BPRS
- 589 ○ CGI S & CGI I
- 590 ○ CADSS

591 ● Cognitive Assessments

- 592 ○ MoCA
- 593 ○ COWAT
- 594 ○ HVLT R
- 595 ○ Stroop

### 596 **7.5.2 Month 3 Follow Up Visit (+/ 2 weeks)**

597  
 598 Update Medical History  
 599 Update Psychiatric Medication Log Vitals (BP,  
 600 heart rate, weight)  
 601 Evaluation for Adverse Events or Serious Adverse Events Psychiatric Evaluation



## 602 Patient Rated Behavioral Scales

- 603 ○ QIDS SR 16 (to be completed first)
- 604 ○ GSE MY
- 605 ○ SMCQ
- 606 ○ PGIC C & PGIC I
- 607 ○ QOLS
- 608 ○ PRISE
- 609 ○ CPFQ

## 610 Clinician Rated Behavioral Scales

- 611 ○ MADRS
- 612 ○ CSSRS
- 613 ○ YMRS
- 614 ○ BPRS
- 615 ○ CGI S & CGI I
- 616 ○ CADSS
- 617
- 618 ● Cognitive Assessments
- 619 ○ MoCA
- 620 ○ COWAT
- 621 ○ HVLT R
- 622 ○ Stroop

623

624 **7.5.3 Month 6 Follow Up Visit (+/ 2 weeks)**

625

626 Update Medical History

627 Update Psychiatric Medication Log Vitals (BP,  
628 heart rate, weight)

629 Evaluation for Adverse Events or Serious Adverse Events Psychiatric Evaluation

## 630 Patient Rated Behavioral Scales

- 631 ○ QIDS SR 16 (to be completed first)
- 632 ○ GSE MY
- 633 ○ SMCQ
- 634 ○ PGIC C & PGIC I
- 635 ○ QOLS
- 636 ○ PRISE
- 637 ○ CPFQ

## 638 Clinician Rated Behavioral Scales

- 639 ○ MADRS
- 640 ○ CSSRS
- 641 ○ YMRS
- 642 ○ BPRS
- 643 ○ CGI S & CGI I
- 644 ○ CADSS

## 645 ● Cognitive Assessments

- 646 ○ MoCA
- 647 ○ COWAT
- 648 ○ HVLT R
- 649 ○ Stroop

650

651

**7.6 Non Compliance**

652 A patient can be withdrawn from the study for non compliance, per investigator discretion, if they  
653 miss two or more consecutive treatments during the acute treatment phase of the study.

654

**7.7 Subject Withdrawal**

655 Subjects may withdraw from study participation or from the study treatment at any time at their  
656 own request, or they may be withdrawn at any time at the discretion of the investigator for  
657 safety or behavioral reasons, or the inability of the subject to comply with the protocol required  
658 schedule of study visits or procedures at a given study site. If the subject elects to discontinue  
659 participation in the study or to discontinue study treatment, the investigator should:

- 660 ● Inquire about the reason for withdrawal
- 661 ● Request the subject to return for an EOT Visit to assess AEs / SAEs, safety  
662 endpoints, outcome events, vital status
- 663 ● Follow up with the subject regarding any unresolved adverse events.

664 If the subject withdraws from the trial and also withdraws consent for disclosure of future  
665 information, no further evaluations should be performed and no additional data should be  
666 collected. Adequate documentation of this request should be obtained and retained in the  
667 subject's source file. True withdrawal of consent should be subject initiated and in writing. The  
668 sponsor may retain and continue to use any data collected before withdrawal of consent.

669

670

**7.8 Lost to Follow Up**

671 Contact information from the patient, including an emergency contact will be obtained at the  
672 time of screening. This information will be reviewed and verified at each clinic visit and telephone  
673 contact.

674 Patients will be considered lost to follow up after three attempts to contact. Study staff should  
 675 document the attempts to contact in the research chart. Every attempt should be made to  
 676 contact the patient as soon as possible after a missed visit. The site should access medical  
 677 records, other health care professionals, institutional databases and any other means to contact  
 678 the patient as allowed by their IRB. All attempts to contact the patient should be documented in  
 679 the medical records. The patient's vital status should be obtained, if possible, at the time of the  
 680 end of study (6 months follow up) from a reliable source or from medical records.

681

682

### **7.9 Study Termination**

683 This study may be terminated or suspended at any time. If the study is terminated or suspended,  
 684 the sponsor will promptly inform the investigators / institutions and PCORI. The IRB should be  
 685 promptly informed and provided the reasons(s) for the termination or suspension by the sponsor  
 686 and by the investigator / institution, as specified by the applicable regulatory requirement(s).

## **687 8. Safety Monitoring and Reporting**

688 Patients will be closely monitored for adverse events (AEs) or serious adverse events (SAEs),  
 689 including worsening of depression symptoms. Study investigators will be able to modify  
 690 treatment or remove patients from the trial based on their clinical discretion and specific patient  
 691 outcomes.

692

693 An adverse event is the development of an undesirable medical condition or the deterioration of a  
 694 pre-existing medical condition following or during exposure to a pharmaceutical product, whether  
 695 or not considered causally related to the product. An undesirable medical condition can be  
 696 symptoms (e.g., nausea, headache, fatigue, blurry vision) or signs (e.g., rapid or irregular heart  
 697 rate, hypertension). In clinical studies, an AE can include an undesirable medical condition  
 698 occurring at any time after the informed consent is signed even if no study treatment has been  
 699 administered.

700 Assessment of adverse events, including grading of severity and attribution to research will  
 701 start at the time of consent. AEs will be evaluated at each visit.

702

703

### **8.1 Unexpected Adverse Events**

704 The following adverse events will be collected from the time of randomization for the study: •

705 Adverse events that are not listed in the current labeling for ketamine (Ketalar  
 706 Product Information) or ECT. This includes events that are similar to those on the  
 707 labeling but differ from the event because of greater severity or specificity.

708 • The following AEs should be captured and recorded on the AE form:

- 709 ○ Prolonged seizure
- 710 ○ Tardive seizure (late occurring)
- 711 ○ Delirium (prolonged)
- 712 ○ Psychosis (prolonged)

- 713 ○ Suicide Attempt
- 714 ○ Severe hypertension (prolonged)
- 715 ○ Dissociation (prolonged)
- 716 ○ Substance abuse (new onset/reoccurrence)
- 717 ○ Clinically significant arrhythmia
- 718 ○ Pregnancy

## 719 8.2 Study Treatment Discontinuation Adverse Events

720 Events that lead to the discontinuation of either treatment (ECT or ketamine) during the  
721 treatment phase, before completion of the final dose, will be collected for the study. These  
722 events will be recorded on either an AE or an SAE form.

## 723 8.3 Serious Adverse Events

724 All SAEs that meet the following definition will be collected from the time of consent until  
725 completion of either the EOT Visit (for non responders) or the six month follow up visit (for  
726 responders).

- 727 ● Results in death
- 728 ● Is immediately life threatening
- 729 ● Requires in patient hospitalization or prolongation of existing hospitalization
- 730 ● Results in persistent or significant disability/incapacity or substantial disruption of  
731 the ability to conduct normal life functions
- 732 ● Is a congenital abnormality or birth defect
- 733 ● Is an important medical event that may jeopardize the patient or may require  
734 medical intervention to prevent one of the outcomes listed above

## 735 8.4 Documentation and Reporting of Serious Adverse Events

736 SAEs will be reported to C5Research within 24 hours of learning of the event. The causality of the  
737 SAE (the relationship to the study treatment/procedures) will be assessed by the investigator.  
738 The SAE will also be documented on the appropriate eCRF.

739 Since the use of Ketamine in the ELEKT D study is exempted from IND reporting, the Investigator  
740 does not have the responsibility to report any AEs/SAEs to the FDA.

## 741 Pregnancy

742 All pregnancies should be reported to C5Research within 24 hours of becoming aware of the  
743 pregnancy.

- 744 ● Maternal exposure ☐ If a patient becomes pregnant during the course  
745 of the study, study treatment will be continued or discontinued per investigator discretion. If  
746 any pregnancy occurs in the course of the study, the investigator must inform C5Research  
747 within 24 hours of awareness of the pregnancy.
- 748 ● Paternal exposure ☐ There are no restrictions against fathering a child when  
749 receiving either ECT or ketamine treatment.

750 **9. Statistical Plan**

751 The key exposures of this study are alternate day ECT treatment and twice a week ketamine  
752 infusion. The primary analyses will be performed on the modified intention to treat (mITT)  
753 population defined as a randomized patient having at least one treatment and one valid QIDS  
754 SR16 measurement during the acute treatment phase. Percent of responders is the primary  
755 outcome in this study. A responder is defined as a subject with a  $\geq 50\%$  decrease from baseline in  
756 the primary endpoint (QIDS SR 16).

757  
758 Multiple imputations may be implemented to achieve completeness of the data. In an unlikely case  
759 that missing data are non ignorable, pattern mixture modeling will be applied.

760 As a general principle the statistical analysis will follow the pre specified statistical analysis plan  
761 (SAP). The SAP will be finalized prior to the end of the study. The SAP will address how missing data  
762 will be handled.

763 The primary outcome measure of response rate will be compared between ketamine and ECT  
764 using a chi square test. A multivariable logistic regression model will be constructed, to account  
765 for potential heterogeneity of treatment effect caused by confounding variables. A similar  
766 analytic strategy will be applied to evaluate cognitive function and quality of life.

767

768 **Sample size**

769 The sample size justification will be for the primary outcome measure of response rate. Historical  
770 data reveal that the overall response rate as well as the respective response rate of ketamine and  
771 of ECT is around 50% - 60% on various scale measurements in patients with treatment resistant  
772 depression. Assuming an observed difference of 10% and an acceptable difference margin of 5%  
773 with a 1 sided  $\alpha=0.025$ , a sample of 400 patients (200 per group) provides 81.8% power to  
774 detect a treatment response, based on the Farrington Manning score test of risk difference. The  
775 total sample also considers a 10% attrition rate.

776

777

778 **10. Study Committees**

779 The following committees will be responsible for the management of the study and the monitoring  
780 of the safety of the study patients.

781

782

**10.1 Executive Committee**

783 The Executive Committee (EC) will have scientific responsibility for the study. They will review  
784 study conduct and progress, consider recommendations from the Data and Safety Monitoring  
785 Board (DSMB), and resolve any other study related issues. The EC will serve as the publishing  
786 committee for the study. The EC Charter document will guide the conduct of the EC.

787

**10.2 Data and Safety Monitoring Board**

788 A Data and Safety Monitoring Board (DSMB) will be appointed to monitor the key safety and  
789 efficacy outcomes at regular intervals, to safeguard the safety and interests of the study

790 participants, and maintain/uphold the scientific merit of the study. Members of the DSMB will not  
 791 be investigators of the study. The DSMB Charter document will guide the conduct of the DSMB,  
 792 and will include the procedures and stopping rules for the study.

### 793 10.3 Stakeholders Committee

794 A Stakeholder Advisory Committee will be formed with investigators, patient partners, patient  
 795 advocacy groups (i.e. Ketamine Advocacy group, NAMI), third party payer representatives (i.e.  
 796 Medical Mutual, Blue Cross). The committee will meet during the study to review study conduct  
 797 and provide input on the progress of the study. The Stakeholder Committee will be involved in  
 798 disseminating the final study results, information and other materials in lay language to  
 799 patients/non scientists.

### 800 10.4 Reporting Plan

801 Study progress reports will be presented at regular intervals to the Executive Committee, the  
 802 Stakeholders Committee, the Data and Safety Monitoring Board (DSMB) and to the Cleveland  
 803 Clinic and site Institutional Review Boards (IRBs). Since this is an un blinded study, the total  
 804 number of subjects enrolled in each treatment arm will be reported. The reports may include  
 805 information on demographics, AEs/SAEs, significant protocol deviations,  
 806 retention/withdrawals.

807

| Committee                    | Participants                                        | Suggested Frequency         |
|------------------------------|-----------------------------------------------------|-----------------------------|
| Executive Committee          | Lead PI, site PIs                                   | Quarterly                   |
| Data Safety Monitoring Board | DSMB Members, P.I.                                  | Twice / year                |
| Stakeholders Committee       | All Investigators and Consultants including Patient | Twice / year                |
| Investigational Review Board | Cleveland Clinic and individual site IRBs           | Annually or more as needed. |

808

809

## 810 **11. Data Handling and Record Keeping**

### 811 11.1 Data Collection

812 Data will be collected by the study personnel at the site. Data sources include patient reports,  
 813 questionnaires and available medical records. An eCRF must be completed for each randomized  
 814 patient. It is the responsibility of the Investigator to ensure that the eCRF is completed accurately  
 815 and in a timely manner. Screen failures should be recorded on the electronic screen failure log  
 816 with the reason for ineligibility.

### 817 11.2 Retention of Records

818 The Investigators must maintain all confidential study documentation and take measures to  
 819 prevent accidental or premature destruction of these documents. Documents should be retained  
 820 for a minimum of six years after the completion or discontinuation of the clinical trial. However,  
 821 applicable regulatory and institutional requirements will be taken into account in the event that a  
 822 longer period is required.

## 823 **12. Study Monitoring, Auditing, and Inspecting**

### 824 Study Monitoring Plan

825 C5Research is responsible for monitoring the conduct of this study. The study will be monitored  
826 according to the Monitoring Plan, and per the applicable C5Research Standard Operation  
827 Procedures for clinical monitoring. It is the responsibility of the Investigator to allocate adequate  
828 time for monitoring, to allow the monitor to access the medical records of the patients and to  
829 provide for adequate space to conduct the monitoring visit.

## 830 **13. Ethical Considerations**

831 The study protocol, consent forms, data collection forms, and recruitment materials, if applicable,  
832 will be submitted to each site's IRB. All study personnel will have completed training in the  
833 Protection of Human Subjects according to Institutional guidelines.

### 834 Institutional Review Board (IRB)

835 It is the investigator's responsibility to ensure that the study protocol and informed consent  
836 documents are reviewed and approved by the appropriate IRB. Each clinical site will obtain a letter  
837 of approval from the IRB before approaching participants. Sites will provide C5Research with copies  
838 of the initial IRB approval notice prior to enrolling the first patient, and subsequent renewals, as  
839 well as copies of the IRB approved consent and other IRB approved forms.

840  
841 If, during the study, it is necessary to amend either the protocol or informed consent document,  
842 the investigator will be responsible for ensuring that the IRB reviews and approves the amended  
843 documents. IRB approval of any procedures must be obtained before implementing new  
844 processes or procedures.

### 845 Informed Consent Document and Process

846 All subjects for this study will be provided a consent form describing this study and providing  
847 sufficient information for subjects to make an informed decision. The informed consent document  
848 will inform patients of their right to refuse any release of their protected health information. Each  
849 clinical site, according to local IRB requirements, is allowed to modify this informed consent  
850 document and make any necessary editorial changes, as long as neither the meaning nor intent of  
851 any section is changed.

852 The investigator or his/her designee (i.e., research coordinator or study nurse) will inform the  
853 patient of all aspects of the study pertaining to the patient's participation in it. The process for  
854 obtaining informed consent will be in accordance with all applicable regulatory requirements.  
855 The informed consent form (ICF) must be signed and dated by the patient and the investigator or  
856 his/her designee BEFORE the patient can participate in the study. The participant will receive a  
857 copy of all signed and dated documents, and the originals will be retained in the patient's study  
858 file or medical record.

859 Subject Information and Consent

860 Each clinical site is responsible for the confidentiality of the data associated with participants  
861 enrolled in this study, in the same manner that it is responsible for the confidentiality of any  
862 patient information within its sphere of responsibility. All forms used for the study data will be  
863 identified by coded identification number, which will be generated at the clinical center, to  
864 maintain subject confidentiality. All records will be kept in locked file cabinets at the clinical centers  
865 with access limited to study staff, and all study staff will identify participants via their unique  
866 identifier. Clinical information will not be released without written permission of the participant,  
867 except as necessary for monitoring by the IRB or DSMB. The participant grants permission to share  
868 research data with these entities in the consent document. Federal regulations govern the  
869 protection of patient's rights relative to data confidentiality and use of research data.

870 Consent procedures and forms, and the communication, transmission and stoppage of patient  
871 data will comply with individual site IRB requirements for compliance with The Health Insurance  
872 Portability and Accountability Act (HIPAA). The Privacy Rule of HIPAA governs the protection of an  
873 individual's identifiable health information. C5Research will ensure that clinical centers associated  
874 with the project comply with HIPAA regulations by requiring documentation from the IRBs with  
875 the appropriate authorization or consent form. C5Research will maintain copies of all relevant  
876 documents from each clinical center. If IRB approvals are not current, data will not be accepted by  
877 C5Research. A secure, electronic data management system will be used to ensure the  
878 confidentiality of electronic protected health information. All questionnaires and study related  
879 materials will be labeled with each participant's coded identification number; there will be no  
880 protected health information indicated on the forms.

881

882 **14. Publication and Disclosure**

883 The study findings will be disseminated to the public through manuscripts, scientific and  
884 patient organization led conferences, press releases and through a dedicated website. The PIs  
885 may also publicize the study findings through talks and public symposia with their local  
886 mental health advocacy organizations (NAMI, DBSA, etc.).

887

888 This study will be registered on ClinicalTrials.gov.



889 **15. References**

- 890 1. Global Burden of Disease; 2004. Geneva, Switzerland: World Health Organization, 2008.
- 891 2. Fournier JC, DeRubeis RJ, Hollon SD, et al. Antidepressant drug effects and depression
- 892 severity: A patient level meta analysis. *JAMA*. 2010;303(1); 47-53
- 893 3. Turner EH, Matthews AM, Linardatos E, Tell RA, Rosenthal R. Selective Publication of
- 894 Antidepressant Trials and Its Influence on Apparent Efficacy. *New England Journal of*
- 895 *Medicine*. 2008;358(3):252-60.
- 896 4. Rush AJ, Trivedi MH, Wisniewski SR, Nierenberg AA, Stewart JW, Warden D, et al. Acute
- 897 and longer term outcomes in depressed outpatients requiring one or several treatment
- 898 steps: a STAR\*D report. *American Journal of Psychiatry*. 2006;163(11):1905-17.
- 899 5. Trivedi MH, Rush AJ, Wisniewski SR, Nierenberg AA, Warden D, Ritz L, et al. Evaluation
- 900 of outcomes with citalopram for depression using measurement based care in STAR\*D:
- 901 implications for clinical practice. *American Journal of Psychiatry*. 2006;163(1):28-40.
- 902 6. Mrazek DA, Hornberger JC, Altar CA, Degtiar I. A Review of the Clinical, Economic, and
- 903 Societal Burden of Treatment Resistant Depression: 1996-2013. *Psychiatric Services*.
- 904 2014;65(8):977-87.
- 905 7. Nemeroff CB. Prevalence and management of treatment resistant depression. *J Clin*
- 906 *Psychiatry*. 2007;68 Suppl8:17-25.
- 907 8. Crown WH, Finkelstein S, Berndt ER, Ling D, Poret AW, Rush AJ, et al. The impact of
- 908 treatment resistant depression on health care utilization and costs. *The Journal of*
- 909 *Clinical Psychiatry*. 2002;63(11):963-71.
- 910 9. Kellner CH, Greenberg RM, Murrrough JW, Bryson EO, Briggs MC, Pasculli RM. ECT in
- 911 Treatment Resistant Depression. *American Journal of Psychiatry*. 2012;169(12):1238-44.
- 912 10. The UKECTRG. Efficacy and safety of electroconvulsive therapy in depressive disorders: a
- 913 systematic review and meta analysis. *The Lancet*. 2003;361(9360):799-808.
- 914 11. Lisanby SH. Electroconvulsive Therapy for Depression. *New England Journal of Medicine*.
- 915 2007;357(19):1939-45.
- 916 12. Golden, C. J., & Freshwater, S. M. (1978). Stroop color and word test.
- 917 13. Blair, J. R., & Spreen, O. (1989). Predicting premorbid IQ: a revision of the National Adult
- 918 Reading Test. *The Clinical Neuropsychologist*, 3(2), 129-136.
- 919 14. van het Rot M, Collins KA, Murrrough JA, Perez AM, Reich DL, Charney DS, et al. Safety
- 920 and efficacy of repeated dose intravenous ketamine for treatment resistant depression.
- 921 *Biological psychiatry*. 2010;67(2):139-45.
- 922 15. Newport DJ, Carpenter LL, McDonald WM, Potash JB, Tohen M, Nemeroff CB. Ketamine
- 923 and Other NMDA Antagonists: Early Clinical Trials and Possible Mechanisms in
- 924 Depression. *The American journal of psychiatry*. 2015;172(10):950-66.
- 925 16. van Waarde JA, van Oudheusden LJ, Verway B, Giltay EJ, van der Mast RC. *European*
- 926 *archives of psychiatry and clinical neuroscience*. 2013 Mar;263(2):167-75. Doi:
- 927 10.1007/s00406-012-0342-7.
- 928 17. Lapidus KA, Kellner CH. *Journal of ECT*. 2011 Sep;27(3):244-6. Doi:
- 929 10.1097/YCT.0b013e31820059e1.

## 16. Appendix

| Table 1 Outcome Measures and Scales     |                                                                             |                                                                                                                                                |
|-----------------------------------------|-----------------------------------------------------------------------------|------------------------------------------------------------------------------------------------------------------------------------------------|
| MEASURE                                 | NAME                                                                        | DESCRIPTION                                                                                                                                    |
| <b>DIAGNOSTIC INTERVIEW</b>             |                                                                             |                                                                                                                                                |
| MINI 7.0                                | Mini Neuropsychiatric Interview                                             | Diagnostic interview used to determine DSM 5 diagnosis (30 mins)                                                                               |
| ATHF                                    | Antidepressant Treatment History Form                                       | Records dosage and duration of antidepressants and other psychiatric medications (30 mins)                                                     |
| <b>PATIENT RATED SCALES</b>             |                                                                             |                                                                                                                                                |
| QIDS SR 16<br>(Primary Outcome Measure) | Quick Inventory of Depressive Symptoms                                      | Self report of depressive symptoms based on DSM diagnostic criteria (10 mins)                                                                  |
| GSE My                                  | Global Self Evaluation of Memory                                            | Self reported scale of global memory (2 mins)                                                                                                  |
| SMCQ                                    | Squire Memory Complaint Questionnaire                                       | Self report of memory issues before and after ECT (5 mins)                                                                                     |
| PGI C and PGI I                         | Patient Global Impression Scale for Severity and Improvement for Depression | 7 point scales assessing improvement and severity of depression (2 mins)                                                                       |
| QOLS                                    | Quality of Life Scale                                                       | Self reported questionnaire that measures quality of life in 8 domains (5 mins)                                                                |
| PRISE                                   | Patient Rated Inventory of Side Effects                                     | Self report of adverse events specific to nine organ or function systems (<5 mins)                                                             |
| <b>CLINICIAN RATED SCALES</b>           |                                                                             |                                                                                                                                                |
| MADRS                                   | Montgomery Asberg Depression Rating Scale                                   | Measures severity of depression symptoms including sadness, concentration, sleep, and disruptive thoughts (10-20 mins)                         |
| CSSRS                                   | Columbia Suicide Severity Rating Scale                                      | Assessment of suicidal ideation (10 mins)                                                                                                      |
| CADSS*                                  | Clinician Administered Dissociative Symptoms Scale                          | Dissociative symptom scale to be administered post treatment (10 mins)                                                                         |
| YMRS                                    | Young Mania Rating Scale                                                    | Measures symptoms of mania (10 mins)                                                                                                           |
| BPRS*                                   | Brief Psychiatric Rating Scale                                              | Measures positive symptoms of psychosis (5 mins)                                                                                               |
| CGI S and CGI I                         | Clinical Global Impression Scale for Severity and Improvement               | Scales to record global clinical impression by a clinician regarding improvement and severity of patients mental condition (5 mins)            |
| <b>COGNITIVE TESTING</b>                |                                                                             |                                                                                                                                                |
| MoCA                                    | Montreal Cognitive Assessment                                               | Tests cognitive function covering 8 cognitive domains including visuospatial assessment, short term memory and working memory (10 mins)        |
| COWAT                                   | Controlled Oral Word Association Test                                       | Verbal fluency test that measures spontaneous production of words belonging to the same category or beginning with the same letter (5-10 mins) |
| HVLT R                                  | Hopkins verbal Learning Test Revised                                        | Verbal learning and memory test with six alternate forms (10 mins)                                                                             |
| Stroop                                  | Stroop Color Word Test                                                      | Measures processing speed and selective inhibition (5 mins)                                                                                    |
| NAART                                   | North American Adult Reading Test                                           | Estimate of premorbid intellectual ability (3 mins)                                                                                            |
| CPFQ                                    | Cognitive and Physical Functioning                                          | Assessment of motivation, energy level, & mental acuity (5 mins)                                                                               |
| *To be administered post treatment      |                                                                             |                                                                                                                                                |

932  
933  
934

| Visit                                         | Screening<br>(within 28<br>days after<br>clinical ECT<br>referral) | Randomization/<br>(Up to 1 week after<br>Screening Visit) | Treatment Phase<br>(Up to 9 treatments over 3- 5 weeks) |    |    |    |    |    |    |    |    | EOT (up<br>to 1 week<br>after<br>last<br>treatment) |     |
|-----------------------------------------------|--------------------------------------------------------------------|-----------------------------------------------------------|---------------------------------------------------------|----|----|----|----|----|----|----|----|-----------------------------------------------------|-----|
|                                               |                                                                    |                                                           | Baseline/<br>V1                                         | V2 | V3 | V4 | V5 | V6 | V7 | V8 | V9 |                                                     | V10 |
| Informed<br>consent                           | X                                                                  |                                                           |                                                         |    |    |    |    |    |    |    |    |                                                     |     |
| Eligibility<br>Criteria                       | X                                                                  |                                                           |                                                         |    |    |    |    |    |    |    |    |                                                     |     |
| Demographics                                  | X                                                                  |                                                           |                                                         |    |    |    |    |    |    |    |    |                                                     |     |
| Medical history                               | X                                                                  |                                                           | X                                                       |    |    |    |    |    |    |    |    |                                                     |     |
| Urine<br>pregnancy test                       | X                                                                  |                                                           |                                                         |    |    |    |    |    |    |    |    |                                                     |     |
| Vitals (BP,<br>heart rate,<br>height, weight) |                                                                    |                                                           | X                                                       | X  | X  | X  | X  | X  | X  | X  | X  | X                                                   | X   |
| Randomization                                 |                                                                    | X                                                         |                                                         |    |    |    |    |    |    |    |    |                                                     |     |
| Psychiatric<br>Evaluation                     | X                                                                  |                                                           | X                                                       | X  | X  | X  | X  | X  | X  | X  | X  | X                                                   | X   |
| ECT                                           |                                                                    |                                                           | X                                                       | X  | X  | X  | X  | X  | X  | X  | X  | X                                                   |     |
| Psychiatric<br>Medication Log                 |                                                                    |                                                           | X                                                       | X  | X  | X  | X  | X  | X  | X  | X  | X                                                   | X   |
| Somatic<br>Therapies Log                      |                                                                    |                                                           | X                                                       | X  | X  | X  | X  | X  | X  | X  | X  | X                                                   | X   |
| Serious<br>Adverse<br>Events/AEs              |                                                                    |                                                           | X                                                       | X  | X  | X  | X  | X  | X  | X  | X  | X                                                   | X   |
| <b>Diagnostic<br/>Interview</b>               |                                                                    |                                                           |                                                         |    |    |    |    |    |    |    |    |                                                     |     |
| MINI 7.0                                      | X                                                                  |                                                           |                                                         |    |    |    |    |    |    |    |    |                                                     |     |
| ATHF                                          | X                                                                  |                                                           |                                                         |    |    |    |    |    |    |    |    |                                                     |     |
| <b>Patient<br/>Rated Scales</b>               |                                                                    |                                                           |                                                         |    |    |    |    |    |    |    |    |                                                     |     |
| QIDS-SR-16                                    |                                                                    |                                                           | X                                                       | X  |    | X  |    | X  | X  |    | X  | X                                                   |     |

935

|                                   |   |  |   |  |   |   |  |   |   |  |   |   |
|-----------------------------------|---|--|---|--|---|---|--|---|---|--|---|---|
| GSE-MY                            |   |  |   |  | X | X |  | X | X |  | X | X |
| SMCQ                              |   |  | X |  | X | X |  | X | X |  | X | X |
| PGI-C                             |   |  | X |  | X | X |  | X | X |  | X | X |
| PGI-I                             |   |  |   |  | X | X |  | X | X |  | X | X |
| QOLS                              |   |  | X |  | X | X |  | X | X |  | X | X |
| PRISE                             |   |  | X |  | X | X |  | X | X |  | X | X |
| CPFQ                              |   |  | X |  | X | X |  | X | X |  | X | X |
| <b>Clinician<br/>Rated Scales</b> |   |  |   |  |   |   |  |   |   |  |   |   |
| MADRS                             | X |  | X |  | X | X |  | X | X |  | X | X |
| CSSRS                             |   |  | X |  | X | X |  | X | X |  | X | X |
| YMRS                              | X |  | X |  | X | X |  | X | X |  | X | X |
| BPRS*                             |   |  | X |  | X | X |  | X | X |  | X | X |
| CGI-S**                           |   |  | X |  | X | X |  | X | X |  | X | X |
| CGI-I**                           |   |  |   |  | X | X |  | X | X |  | X | X |
| CADSS*                            |   |  | X |  | X | X |  | X | X |  | X | X |
| <b>Cognitive<br/>Assessments</b>  |   |  |   |  |   |   |  |   |   |  |   |   |
| MoCA                              | X |  |   |  |   |   |  |   |   |  |   | X |
| COWAT                             |   |  | X |  |   |   |  |   |   |  |   | X |
| HVLT-R                            |   |  | X |  |   |   |  |   |   |  |   | X |
| Stroop                            |   |  | X |  |   |   |  |   |   |  |   | X |
| NAART                             |   |  | X |  |   |   |  |   |   |  |   |   |

936

937

938

939

940

\*CADSS and BPRS to be administered post treatment.

\*\*CGI-S and CGI-I to be performed by psychiatrist.

| Visit                                   | Screening<br>(Within 28 days after clinical ECT referral) | Randomization<br>(Up to 1 week from Screening Visit) | Treatment Phase<br>(Up to 6 treatments over 3- 5 weeks) |    |    |    |    |    | EOT<br>(+/- 1 week) |
|-----------------------------------------|-----------------------------------------------------------|------------------------------------------------------|---------------------------------------------------------|----|----|----|----|----|---------------------|
|                                         |                                                           |                                                      | Baseline/V1                                             | V2 | V3 | V4 | V5 | V6 |                     |
| Informed consent                        | X                                                         |                                                      |                                                         |    |    |    |    |    |                     |
| Eligibility Criteria                    | X                                                         |                                                      |                                                         |    |    |    |    |    |                     |
| Demographics                            | X                                                         |                                                      |                                                         |    |    |    |    |    |                     |
| Medical history                         | X                                                         |                                                      | X                                                       |    |    |    |    |    |                     |
| Urine pregnancy test                    | X                                                         |                                                      |                                                         |    |    |    |    |    |                     |
| Vitals (BP, heart rate, height, weight) |                                                           |                                                      | X                                                       | X  | X  | X  | X  | X  | X                   |
| Randomization                           |                                                           | X                                                    |                                                         |    |    |    |    |    |                     |
| Psychiatric Evaluation                  | X                                                         |                                                      | X                                                       | X  | X  | X  | X  | X  | X                   |
| Ketamine Infusion                       |                                                           |                                                      | X                                                       | X  | X  | X  | X  | X  |                     |
| Psychiatric Medication Log              |                                                           |                                                      | X                                                       | X  | X  | X  | X  | X  | X                   |
| Somatic Therapies Log                   |                                                           |                                                      | X                                                       | X  | X  | X  | X  | X  | X                   |
| Serious Adverse Events/AEs              |                                                           |                                                      | X                                                       | X  | X  | X  | X  | X  | X                   |
| <b>Diagnostic Interview</b>             |                                                           |                                                      |                                                         |    |    |    |    |    |                     |
| MINI 7.0                                | X                                                         |                                                      |                                                         |    |    |    |    |    |                     |
| ATHF                                    | X                                                         |                                                      |                                                         |    |    |    |    |    |                     |
| <b>Patient Rated Scales</b>             |                                                           |                                                      |                                                         |    |    |    |    |    |                     |
| QIDS-SR-16                              |                                                           |                                                      | X                                                       | X  | X  | X  | X  | X  | X                   |

|                                   |   |  |   |   |   |   |   |   |   |
|-----------------------------------|---|--|---|---|---|---|---|---|---|
| GSE-MY                            |   |  |   | X | X | X | X | X | X |
| SMCQ                              |   |  | X | X | X | X | X | X | X |
| PGI-C                             |   |  | X | X | X | X | X | X | X |
| PGI-I                             |   |  |   | X | X | X | X | X | X |
| QOLS                              |   |  | X | X | X | X | X | X | X |
| PRISE                             |   |  | X | X | X | X | X | X | X |
| CPFQ                              |   |  | X | X | X | X | X | X | X |
| <b>Clinician<br/>Rated Scales</b> |   |  |   |   |   |   |   |   |   |
| MADRS                             | X |  | X | X | X | X | X | X | X |
| CSSRS                             |   |  | X | X | X | X | X | X | X |
| YMRS                              | X |  | X | X | X | X | X | X | X |
| BPRS*                             |   |  | X | X | X | X | X | X | X |
| CGI-S**                           |   |  | X | X | X | X | X | X | X |
| CGI-I**                           |   |  |   | X | X | X | X | X | X |
| CADSS*                            |   |  | X | X | X | X | X | X | X |
| <b>Cognitive<br/>Assessments</b>  |   |  |   |   |   |   |   |   |   |
| MoCA                              | X |  |   |   |   |   |   |   | X |
| COWAT                             |   |  | X |   |   |   |   |   | X |
| HVLT-R                            |   |  | X |   |   |   |   |   | X |
| Stroop                            |   |  | X |   |   |   |   |   | X |
| NAART                             |   |  | X |   |   |   |   |   |   |

943

944

\*CADSS and BPRS to be administered post treatment.

945

946

\*\*CGI-S and CGI-I to be performed by psychiatrist.

947

| <b>Visit</b>                       | <b>Month 1<br/>(+/- 2 weeks)</b> | <b>Month 3<br/>(+/- 2 weeks)</b> | <b>Month 6<br/>(+/- 2 weeks)</b> |
|------------------------------------|----------------------------------|----------------------------------|----------------------------------|
| Update Medical History             | X                                | X                                | X                                |
| Vitals (BP, heart rate,<br>weight) | X                                | X                                | X                                |
| Psychiatric Evaluation             | X                                | X                                | X                                |
| Psychiatric Medication<br>Log      | X                                | X                                | X                                |
| Somatic Therapies Log              | X                                | X                                | X                                |
| Serious Adverse<br>Events/AEs      | X                                | X                                | X                                |
| <b>Patient Rated Scales</b>        |                                  |                                  |                                  |
| QIDS-SR-16                         | X                                | X                                | X                                |
| GSE-MY                             | X                                | X                                | X                                |
| SMCQ                               | X                                | X                                | X                                |
| PGI-C & PGI-I                      | X                                | X                                | X                                |
| QOLS                               | X                                | X                                | X                                |
| PRISE                              | X                                | X                                | X                                |
| CPFQ                               | X                                | X                                | X                                |
| <b>Clinician Rated Scales</b>      |                                  |                                  |                                  |
| MADRS                              | X                                | X                                | X                                |
| CSSRS                              | X                                | X                                | X                                |
| YMRS                               | X                                | X                                | X                                |
| BPRS                               | X                                | X                                | X                                |
| CGI-S & CGI-I*                     | X                                | X                                | X                                |
| CADSS                              | X                                | X                                | X                                |
| <b>Cognitive<br/>Assessments</b>   |                                  |                                  |                                  |
| MoCA                               | X                                | X                                | X                                |
| COWAT                              | X                                | X                                | X                                |
| HVLT-R                             | X                                | X                                | X                                |
| Stroop                             | X                                | X                                | X                                |

948  
949  
950

\*To be performed by psychiatrist
