# Supplementary material for: Ketamine vs Electroconvulsive Therapy for Treatment-Resistant Depression: A Secondary Analysis of a Randomized Clinical Trial
Source: PubMed Central journal article supplement (PMC11200139; doi:10.1001/jamanetworkopen.2024.17786), 2024-06-25
Supplement: jamanetwopen-e2417786-s002.pdf [file jamanetwopen-e2417786-s002.pdf]

## Supplemental Online Content

Jha MK, Wilkinson ST, Krishnan K, et al. Ketamine vs electroconvulsive therapy for treatment-resistant depression: a secondary analysis of a randomized clinical trial. *JAMA Netw Open*. 2024;7(6):e2417786. doi:10.1001/jamanetworkopen.2024.17786

**eFigure 1.** CONSORT Diagram of ELEKT-D Participants Included in This Report

**eFigure 2.** Changes in QIDS-SR16 With Ketamine vs ECT Based on Hospital Admission Status at the Time of First Treatment

**eFigure 3.** Differential Rates of Response and Remission With Ketamine vs ECT Based on Standardized Scores on the North American Adult Reading Test 35 (NAART-35)

**eFigure 4.** Treatment Effects of Ketamine vs ECT Based on MADRS Stratified by Less (Left Panel) or More (Right Panel) Severe Baseline Depression Severity

**eFigure 5.** Treatment Effects of ECT Based on Presence of Comorbid PTSD

**eFigure 6.** Treatment Effects of ECT Based on HVLT-R Levels at Baseline

**eFigure 7.** Treatment Effects of Ketamine and ECT Based on Body Mass Index (BMI) Categories

**eTable 1.** Baseline Feature of ELEKT-D Participants Randomized to ECT Who Dropped Out (ie, Did Not Complete Any Posttreatment Assessment) vs Those Who Did Not

**eTable 2.** Baseline Features That Predict Response and Remission With ECT vs Ketamine

**eTable 3.** Baseline Features That Predict Response and Remission in Separate Analyses for ECT and Ketamine Treatment Groups

This supplemental material has been provided by the authors to give readers additional information about their work.

**eFigure 1.** CONSORT Diagram of ELEKT-D Participants Included in This Report

**CONSORT DIAGRAM**

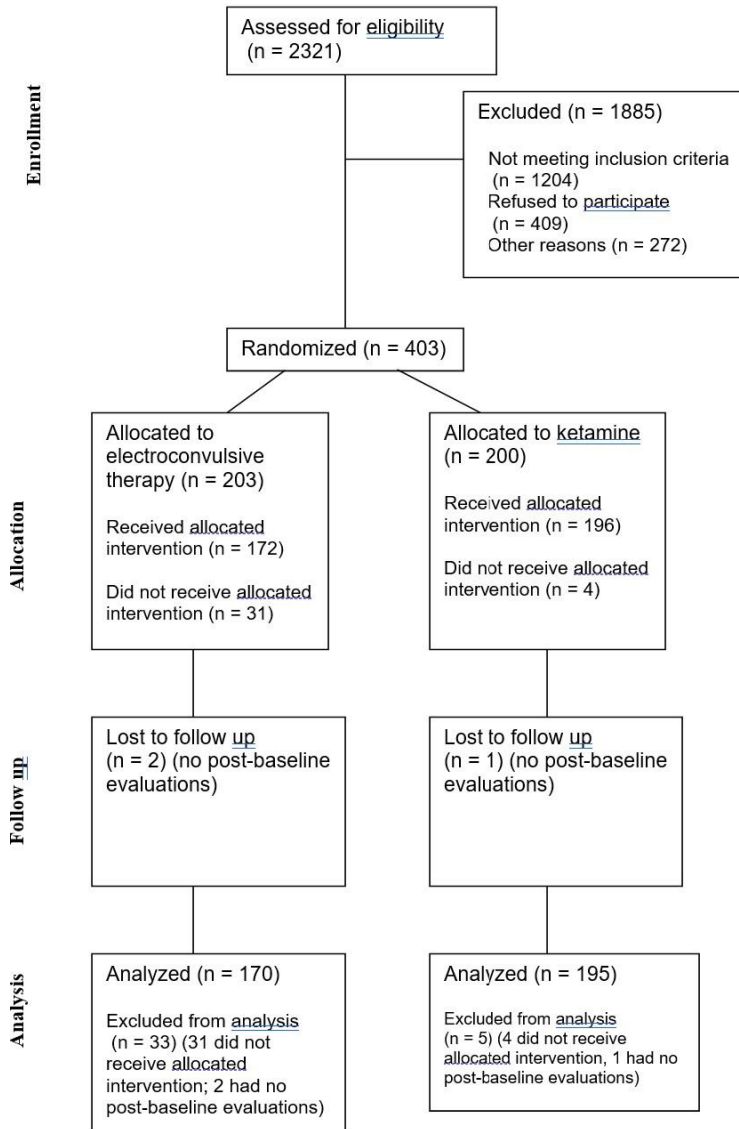

**eFigure 2.** Changes in QIDS-SR16 With Ketamine vs ECT Based on Hospital Admission Status at the Time of First Treatment

Panel A. Levels of QIDS-SR16 from baseline to the end-of-treatment visit.

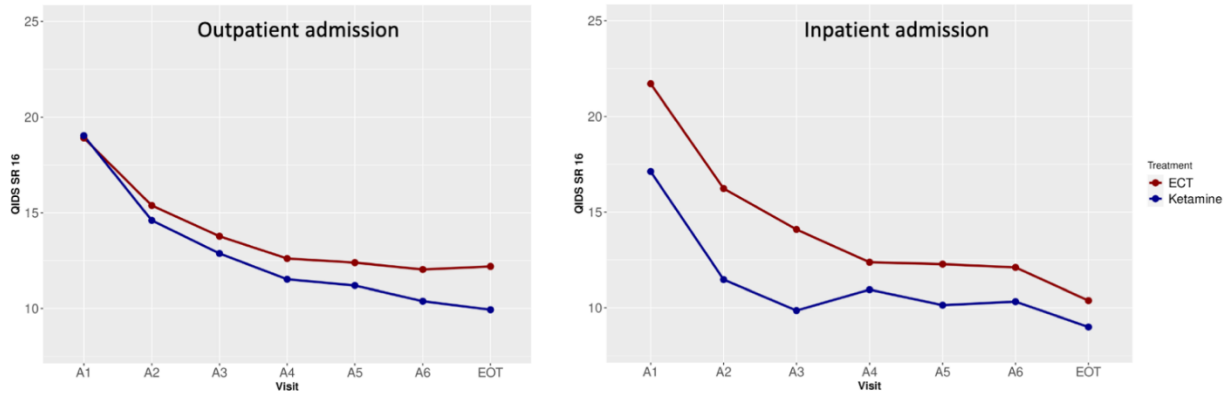

Panel B. Changes in QIDS-SR16 from baseline to end-of-treatment visit.

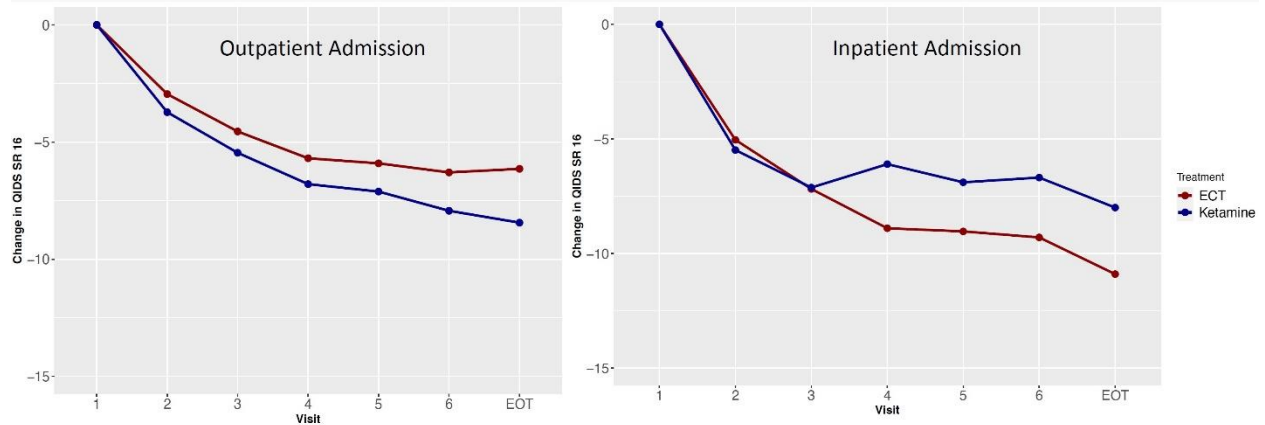

Legends: ECT is electroconvulsive therapy, QIDS-SR16 is 16-item Quick Inventory of Depressive Symptomatology Self-Report version. A1 to A6 are visits 1 to 6 and EOT is end-of-treatment visit.

**eFigure 3.** Differential Rates of Response and Remission With Ketamine vs ECT Based on Standardized Scores on the North American Adult Reading Test 35 (NAART-35)

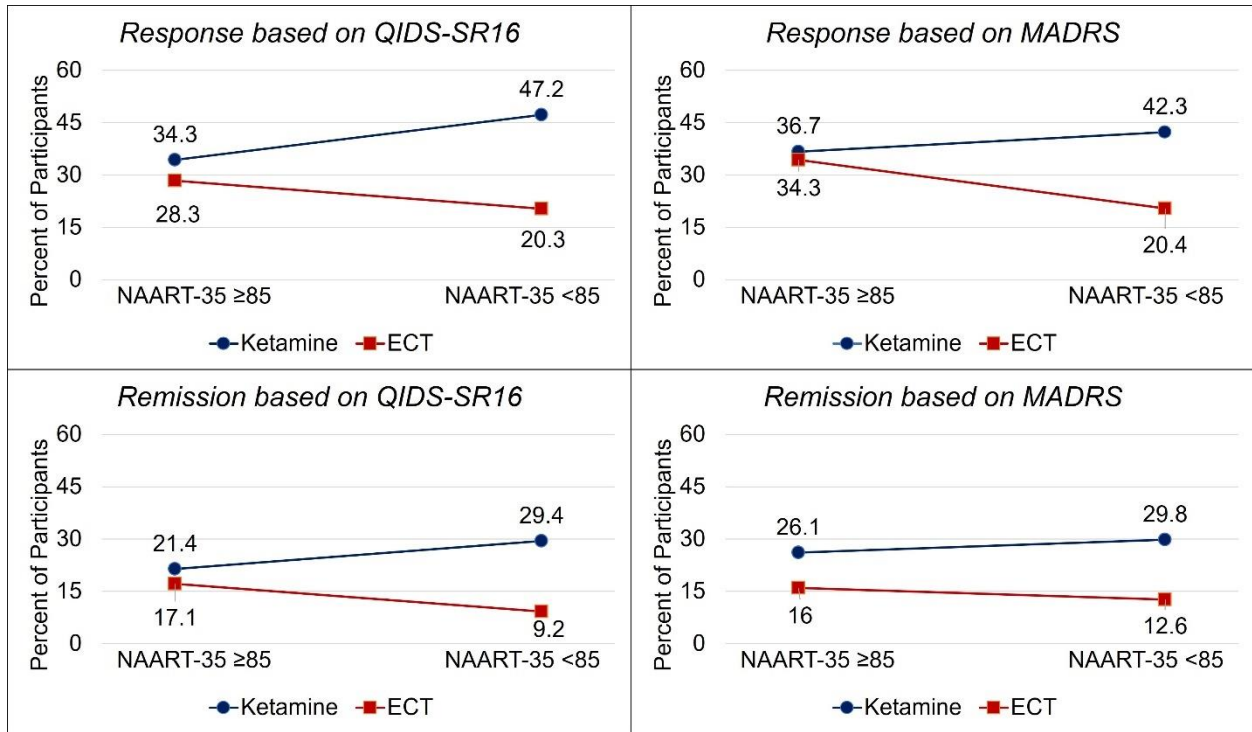

Legends: ECT is electroconvulsive therapy, QIDS-SR16 is 16-item Quick Inventory of Depressive Symptomatology Self-Report version.

**eFigure 4.** Treatment Effects of Ketamine vs ECT Based on MADRS Stratified by Less (Left Panel) or More (Right Panel) Severe Baseline Depression Severity

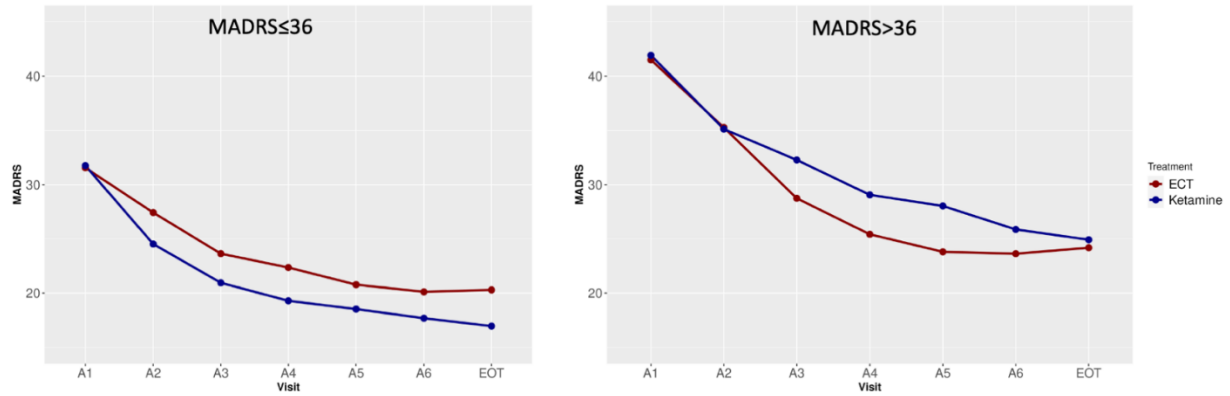

Legends: MADRS is Montgomery Åsberg Depression Rating Scale. Least square means from mixed model analyses were plotted for both treatment groups [electroconvulsive therapy (ECT) or ketamine] based on baseline depression severity thresholds of moderate severe or severe (MADRS  $\leq 36$ ) or very severe (MADRS  $> 36$ ).

**eFigure 5.** Treatment Effects of ECT Based on Presence of Comorbid PTSD

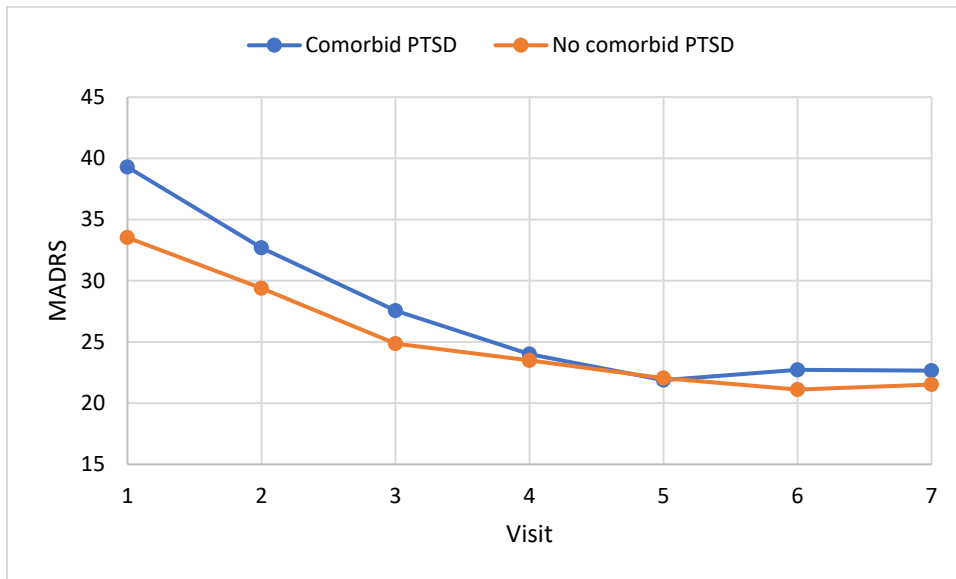

Legends: ECT is electroconvulsive therapy, PTSD is post-traumatic stress disorder. MADRS is Montgomery Åsberg Depression Rating Scale. Visit 7 was the end-of-treatment visit.

**eFigure 6.** Treatment Effects of ECT Based on HVLt-R Levels at Baseline

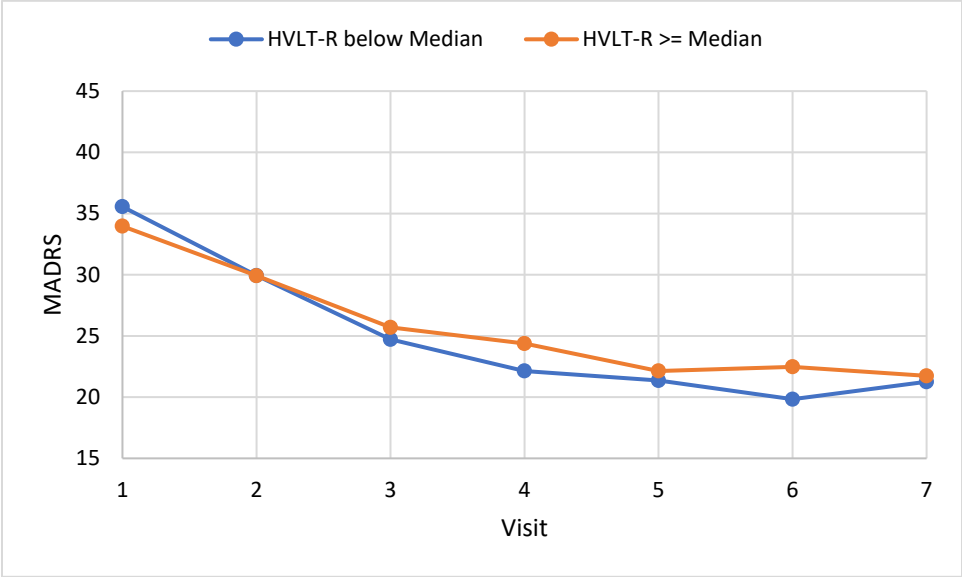

Legends: ECT is electroconvulsive therapy, HVLt is the Hopkins Verbal Learning Test. MADRS is Montgomery Åsberg Depression Rating Scale. Visit 7 was the end-of-treatment visit.

**eFigure 7.** Treatment Effects of Ketamine and ECT Based on Body Mass Index (BMI)

Categories

Panel A. Treatment effect of ketamine on changes in QIDS-SR16 based on BMI categories.

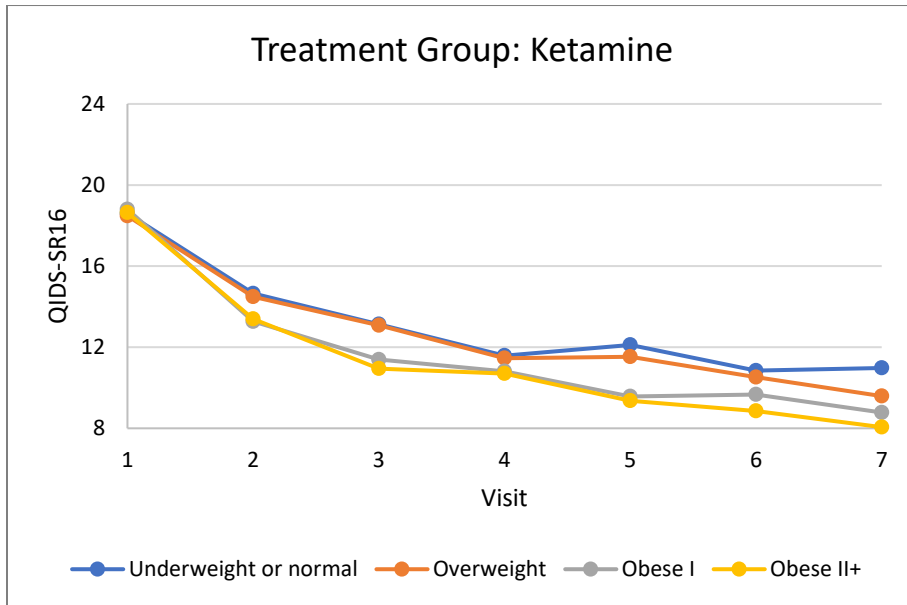

Panel B. Treatment effects of ketamine on changes in MADRS based on BMI categories.

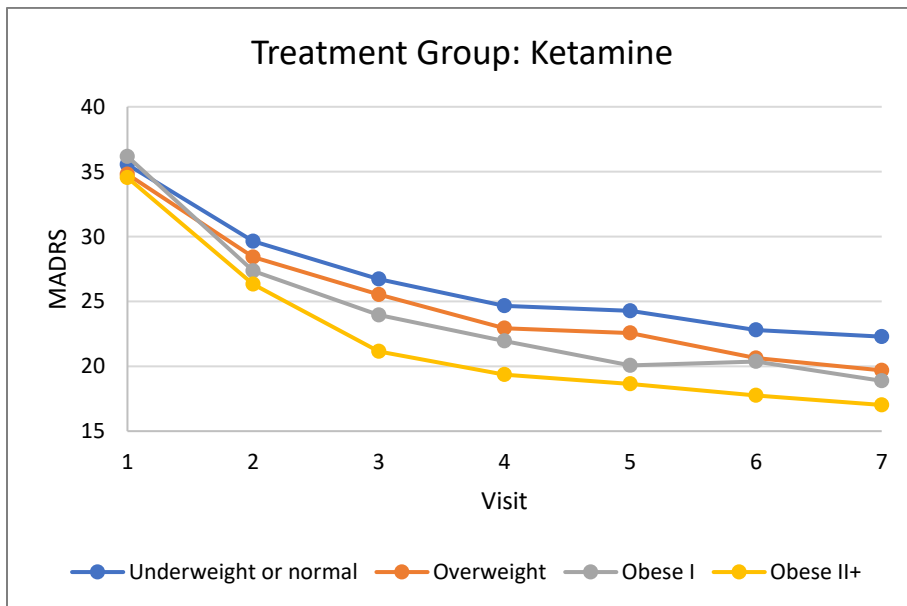

Panel C. Treatment effects of ECT on changes in QIDS-SR based on BMI categories.



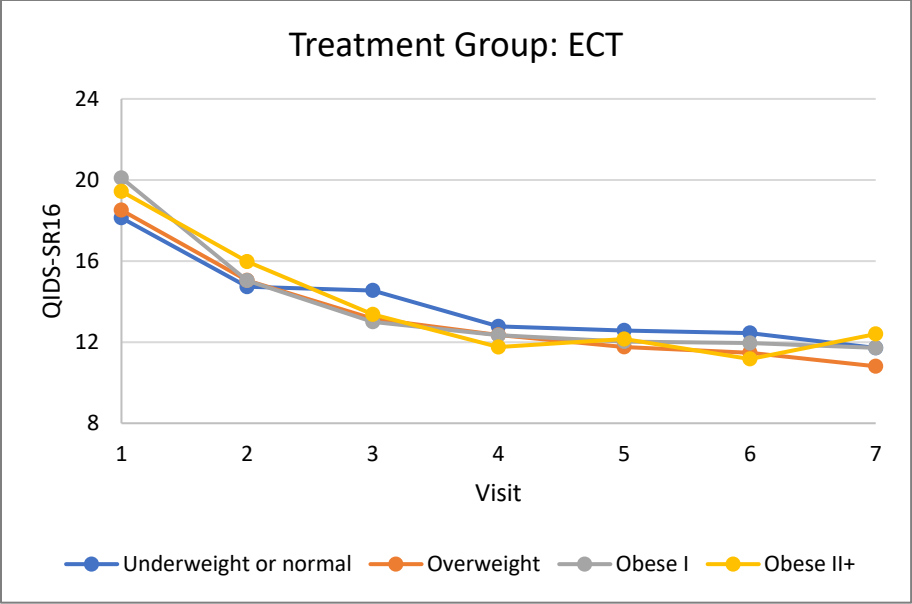

Legend: Categories of underweight or normal, overweight, obese I, and obese II+ were defined as BMI values of <25.0, 25.0 to 29.9, 30.0 to 34.9, and ≥35.0, respectively. QIDS-SR16 is 16-item Quick Inventory of Depressive Symptomatology Self-Report version MADRS is Montgomery Åsberg Depression Rating Scale. Visit 7 was the end-of-treatment visit.

**eTable 1.** Baseline Feature of ELEKT-D Participants Randomized to ECT Who Dropped Out (ie, Did Not Complete Any Posttreatment Assessment) vs Those Who Did Not

|                                                  | Dropout from ECT | Did not drop out from ECT |
|--------------------------------------------------|------------------|---------------------------|
| Number                                           | 33               | 170                       |
| <u>Categorical variables</u>                     |                  |                           |
| Male sex (%)                                     | 20 ( 60.6)       | 83 (48.8)                 |
| Female sex (%)                                   | 13 ( 39.4)       | 87 (51.2)                 |
| Race                                             |                  |                           |
| African descendant (%) new_race (%)              | 2 ( 6.1)         | 10 ( 5.9)                 |
| European descendant (%)                          | 31 ( 93.9)       | 151 (88.8)                |
| Other* (%)                                       | 0 ( 0.0)         | 9 ( 5.3)                  |
| Ethnicity                                        |                  |                           |
| Hispanic (%)                                     | 4 ( 12.1)        | 7 ( 4.1)                  |
| Non-Hispanic (%)                                 | 29 ( 87.9)       | 163 (95.9)                |
| History of suicide attempt (%)                   | 14 ( 42.4)       | 70 (41.2)                 |
| Anxious features absent                          | 13 ( 39.4)       | 80 (47.1)                 |
| Anxious features present                         | 20 ( 60.6)       | 90 (52.9)                 |
| No comorbid Post-traumatic Stress Disorder (%)   | 26 ( 78.8)       | 127 (74.7)                |
| Comorbid Post-traumatic Stress Disorder (%)      | 7 ( 21.2)        | 43 (25.3)                 |
| No concurrent use of benzodiazepines (%)         | 26 ( 78.8)       | 114 (67.1)                |
| Concurrent use of benzodiazepines (%)            | 7 ( 21.2)        | 56 (32.9)                 |
| No concurrent use of atypical antipsychotics (%) | 22 ( 66.7)       | 123 (72.4)                |
| Concurrent use of atypical antipsychotics (%)    | 11 ( 33.3)       | 47 (27.6)                 |

|                                                    |               |               |
|----------------------------------------------------|---------------|---------------|
| Initiation of treatment as outpatient (%)          | 33 (100.0)    | 149 (87.6)    |
| Initiation of treatment as inpatient               | 0 ( 0.0)      | 21 (12.4)     |
| Site                                               |               |               |
| Baylor College of Medicine (%)                     | 12 ( 36.4)    | 36 (21.2)     |
| Cleveland Clinic (%)                               | 7 ( 21.2)     | 51 (30.0)     |
| Mount Sinai (%)                                    | 6 ( 18.2)     | 28 (16.5)     |
| Yale (%)                                           | 2 ( 6.1)      | 37 (21.8)     |
| Johns Hopkins (%)                                  | 6 ( 18.2)     | 18 (10.6)     |
| <u>Continuous variables</u>                        |               |               |
| Age in years, Mean (SD)                            | 49.85 (13.49) | 46.56 (14.14) |
| QIDS-SR16, Mean (SD)                               | 17.00 (4.24)  | 18.24 (4.17)  |
| MADRS, Mean (SD)                                   | 31.00 (1.41)  | 32.64 (6.08)  |
| MoCA, Mean (SD)                                    | 26.09 (2.49)  | 26.54 (2.59)  |
| HVLT Delayed Recall, Mean (SD)                     | 38.00 (5.66)  | 37.82 (14.67) |
| NAART-35 score, Mean (SD)                          | 87.00 (11.31) | 89.45 (8.75)  |
| Body mass index (in kg/m <sup>2</sup> ), Mean (SD) | 26.76 (8.46)  | 30.46 (7.91)  |

\*including Asian, American Indian/native, multi-race and other races that were self-reported. ELEKT-D is the ELEctroconvulsive therapy (ECT) vs. Ketamine in patients with Treatment-resistant Depression study, ECT is Electroconvulsive Therapy, PTSD is post-traumatic stress disorder, QIDS-SR16 is 16-item Quick Inventory of Depressive Symptomatology Self-Report version, MADRS is Montgomery Åsberg Depression Rating Scale, MoCA is Montreal Cognitive Assessment, HVLT is Hopkins Verbal Learning Test, and NAART-35 is the North American Adult Reading Test 35.

**eTable 2.** Baseline Features That Predict Response and Remission With ECT vs Ketamine

|                                        | QIDS-SR outcome |         | MADRS outcome |         |
|----------------------------------------|-----------------|---------|---------------|---------|
|                                        | $\chi^2$        | p value | $\chi^2$      | p value |
| <u><i>Response as the outcome</i></u>  |                 |         |               |         |
| NAART-35 standard score                | 5.92            | 0.015   | 4.61          | 0.032   |
| Baseline depression severity*          | 0.38            | 0.54    | 1.46          | 0.23    |
| MoCA score                             | 1.87            | 0.17    | 0.13          | 0.72    |
| HVLT-R Delayed Recall T-score          | 0.15            | 0.69    | 0.38          | 0.54    |
| Concurrent benzodiazepine              | 2.37            | 0.12    | 1.55          | 0.21    |
| Concurrent atypical antipsychotic      | 0.69            | 0.41    | 0.023         | 0.88    |
| Body mass index                        | 2.91            | 0.088   | 2.16          | 0.14    |
| History of suicide attempt             | 0.0056          | 0.94    | 0.011         | 0.92    |
| Inpatient status at first treatment    | 1.95            | 0.16    | 0.82          | 0.37    |
| Presence of anxious features           | 0.025           | 0.88    | 0.77          | 0.38    |
| Comorbid PTSD Diagnosis                | 1.14            | 0.28    | 0.32          | 0.57    |
| <u><i>Remission as the outcome</i></u> |                 |         |               |         |
| NAART-35 standard score                | 6.17            | 0.013   | 1.89          | 0.17    |
| Baseline depression severity*          | 0.29            | 0.59    | 0.021         | 0.89    |
| MoCA score                             | 0.50            | 0.48    | 0.41          | 0.52    |
| HVLT-R Delayed Recall T-score          | 0.12            | 0.73    | 0.17          | 0.68    |
| Concurrent benzodiazepine              | 1.37            | 0.24    | 0.69          | 0.41    |
| Concurrent atypical antipsychotic      | 1.77            | 0.18    | 5.50          | 0.019   |
| Body mass index                        | 2.21            | 0.14    | 0.79          | 0.37    |

|                                     |       |      |       |      |
|-------------------------------------|-------|------|-------|------|
| History of suicide attempt          | 0.053 | 0.82 | 0.10  | 0.75 |
| Inpatient status at first treatment | 0.011 | 0.92 | 0.32  | 0.57 |
| Presence of anxious features        | 0.036 | 0.85 | 0.55  | 0.46 |
| Comorbid PTSD Diagnosis             | 0.91  | 0.34 | 0.075 | 0.78 |

Footnotes: \* same measures as the outcome measure. There were no  $p < 0.05$  false discovery rate (FDR) correction for multiple comparisons. PTSD is post-traumatic stress disorder, QIDS-SR16 is 16-item Quick Inventory of Depressive Symptomatology Self-Report version, MADRS is Montgomery Åsberg Depression Rating Scale, MoCA is Montreal Cognitive Assessment, HVLTL is Hopkins Verbal Learning Test, and NAART-35 is the North American Adult Reading Test 35.

**eTable 3.** Baseline Features That Predict Response and Remission in Separate Analyses for ECT and Ketamine Treatment Groups

|                                         | Response as the outcome |             |            |            | Remission as the outcome |            |            |            |
|-----------------------------------------|-------------------------|-------------|------------|------------|--------------------------|------------|------------|------------|
|                                         | QIDS-SR16               |             | MADRS      |            | QIDS-SR16                |            | MADRS      |            |
|                                         | Odds Ratio*<br>*        | 95% CL      | Odds Ratio | 95% CL     | Odds Ratio               | 95% CL     | Odds Ratio | 95% CL     |
| <b><u>ECT as the treatment</u></b>      |                         |             |            |            |                          |            |            |            |
| Baseline depression severity*           | 0.98                    | 0.70, 1.38  | 0.93       | 0.64, 1.33 | 0.62                     | 0.41, 0.93 | 0.68       | 0.44, 1.05 |
| MoCA score                              | 1.29                    | 0.91, 1.82  | 1.05       | 0.75, 1.48 | 0.98                     | 0.65, 1.48 | 0.92       | 0.62, 1.36 |
| HVLT Delayed Recall score               | 1.10                    | 0.78, 1.56  | 0.92       | 0.65, 1.29 | 0.96                     | 0.64, 1.45 | 0.97       | 0.65, 1.44 |
| Concurrent benzodiazepine               | 0.79                    | 0.39, 1.62  | 0.62       | 0.30, 1.29 | 0.51                     | 0.20, 1.33 | 0.51       | 0.21, 1.25 |
| Concurrent atypical antipsychotic       | 1.20                    | 0.56, 2.57  | 1.40       | 0.65, 3.03 | 0.47                     | 0.16, 1.40 | 0.37       | 0.13, 1.08 |
| Body mass index                         | 0.96                    | 0.68, 1.34  | 1.03       | 0.74, 1.44 | 1.19                     | 0.79, 1.78 | 1.00       | 0.68, 1.48 |
| History of suicide attempt              | 1.03                    | 0.53, 2.00  | 1.00       | 0.51, 1.96 | 1.13                     | 0.51, 2.51 | 0.88       | 0.41, 1.89 |
| Inpatient status at first treatment     | 3.67                    | 1.28, 10.49 | 2.36       | 0.82, 6.78 | 1.35                     | 0.38, 4.76 | 1.95       | 0.64, 5.95 |
| Presence of anxious features            | 0.61                    | 0.30, 1.23  | 0.41       | 0.19, 0.85 | 0.53                     | 0.23, 1.24 | 0.73       | 0.33, 1.63 |
| Comorbid PTSD Diagnosis                 | 0.85                    | 0.37, 1.95  | 1.29       | 0.57, 2.94 | 1.02                     | 0.38, 2.72 | 1.16       | 0.46, 2.94 |
| <b><u>Ketamine as the treatment</u></b> |                         |             |            |            |                          |            |            |            |
| Baseline depression severity*           | 0.91                    | 0.67, 1.23  | 0.95       | 0.69, 1.31 | 0.49                     | 0.35, 0.70 | 0.70       | 0.49, 0.99 |
| MoCA score                              | 0.98                    | 0.71, 1.35  | 1.12       | 0.82, 1.53 | 1.09                     | 0.77, 1.54 | 1.06       | 0.76, 1.47 |
| HVLT Delayed Recall score               | 0.85                    | 0.62, 1.17  | 0.97       | 0.71, 1.31 | 0.79                     | 0.57, 1.10 | 0.80       | 0.58, 1.09 |
| Concurrent benzodiazepine               | 1.12                    | 0.55, 2.27  | 0.81       | 0.41, 1.62 | 0.86                     | 0.41, 1.80 | 0.73       | 0.35, 1.49 |
| Concurrent atypical antipsychotic       | 1.45                    | 0.72, 2.91  | 1.26       | 0.65, 2.44 | 1.02                     | 0.50, 2.10 | 1.64       | 0.83, 3.27 |
| Body mass index                         | 1.31                    | 0.93, 1.84  | 1.33       | 0.97, 1.83 | 1.63                     | 1.15, 2.30 | 1.23       | 0.90, 1.70 |
| History of suicide attempt              | 0.99                    | 0.53, 1.86  | 1.02       | 0.55, 1.88 | 0.90                     | 0.46, 1.74 | 1.00       | 0.53, 1.89 |
| Inpatient status at first treatment     | 1.13                    | 0.43, 2.95  | 1.05       | 0.41, 2.69 | 1.37                     | 0.49, 3.87 | 1.27       | 0.47, 3.42 |
| Presence of anxious features            | 0.84                    | 0.43, 1.65  | 0.92       | 0.48, 1.76 | 0.53                     | 0.26, 1.08 | 0.53       | 0.27, 1.05 |
| Comorbid PTSD Diagnosis                 | 1.62                    | 0.70, 3.74  | 1.90       | 0.85, 4.25 | 1.55                     | 0.69, 3.47 | 1.25       | 0.56, 2.77 |

Footnotes: \* same measures as the outcome measure. \*\*OR expressed as per SD increase for continuous predictors and yes vs no for binary predictors. PTSD is post-traumatic stress disorder, QIDS-SR16 is 16-item Quick Inventory of Depressive Symptomatology Self-Report version, MADRS is Montgomery Åsberg Depression Rating Scale, MoCA is Montreal Cognitive Assessment, HVLT is Hopkins Verbal Learning Test, and NAART-35 is the North American Adult Reading Test 35.
