# Supplementary material for: Ketamine vs Electroconvulsive Therapy for Treatment-Resistant Depression: A Secondary Analysis of a Randomized Clinical Trial
Source: PubMed Central journal article supplement (PMC11200139; doi:10.1001/jamanetworkopen.2024.17786), 2024-06-25
Supplement: jamanetwopen-e2417786-s003.pdf [file jamanetwopen-e2417786-s003.pdf]

## Data Sharing Statement

Jha. Ketamine vs Electroconvulsive Therapy for Treatment-Resistant Depression. *JAMA Netw Open*. Published June 25, 2024. doi:10.1001/jamanetworkopen.2024.17786

### Data

**Data available:** No
